# Supplementary material for: Crustal porosity reveals the bombardment history of the Moon
Source: Research Square preprint supplement (doi:10.21203/rs.3.rs-98852/v1), 2021-01-06
Supplement: Supplementary file 1 [file 9226407bea227482ee477722.xlsx]

## Sheet: All basins
	Basin Name	Observed Mean Porosity (%)	Final Mean Model Porosity (%)	Observed Standard Deviation (%)	Model Standard Deviation (%)	Crater Diameter (km)	Long	Lat	Relative impact flux (~<3 Ga impact rate)	Assigned crater counting age (true only when column N is 1)	Size dependent model peak porosity (%)	Final model peak porosity (%)	True crater count age (1: true; 0: assigned)	SP-A interior basins (1: true; 0: assigned)	Density gradient<5 kg m-3km-1	Inside SPA	Th>3.5PPM	Highlands
	Amundsen-Ganswindt	11.646	12.869	1.4571	1.6493	377	124.36	-80.59	445.3	4.26	15.885	11.7783	1	1	0	5	0	9
	Apollo	13.699	14.104	0.46841	0.57226	492	-151.48	-36.09	196.2	4.14	16.46	14.6137	1	1	1	17	0	8
	Birkhoff	12.954	12.451	1.4192	0.9629	334	-146.58	58.88	547.2	4.29	15.67	10.7578	1	0	0	0	0	9
	Coulomb-Sarton	13.101	12.589	1.8504	1.0552	672	-122.534	51.3098	362.5	4.23	17.36	13.232	1	0	1	0	2	41
	Crisium	14.661	14.514	1.6572	1.5114	1091.52	59.1674	17.1814	122.3	4.07	18.5	17.1096	1	0	35	0	15	68
	Crüger-Sirsalis	17.626	16.95	0.56386	0.33422	410	-66.0722	-15.9939	445.3	4.26	16.05	11.8282	1	0	10	0	10	2
	Dirichlet-Jackson	13.332	13.133	1.5087	1.405	452	-158.164	13.4308	362.5	4.23	16.26	12.749	1	0	0	0	0	19
	Fitzgerald-Jackson	13.395	12.97	2.0244	1.5013	564	-169.841	25.0696	445.3	4.26	16.82	12.0609	1	0	0	0	0	30
	Freundlich-Sharonov	14.127	13.398	1.9063	1.645	582.285	175.004	18.2871	196.2	4.14	16.9114	14.9361	1	0	0	0	0	35
	Grimaldi	15.756	15.886	2.7047	1.4134	460	-68.6893	-5.0077	196.2	4.14	16.3	14.4994	1	0	11	0	5	11
	Hertzsprung	13.653	14.314	1.7316	1.986	549.393	-129.157	2.0184	139.9	4.09	16.747	15.4469	1	0	0	0	0	30
	Humboldtianum	14.288	14.194	1.7101	1.8172	603.126	81.8853	57.1065	130.8	4.08	17.0156	15.7694	1	0	1	0	2	33
	Humorum	14.565	14.698	2.9345	1.9944	816	-39.6967	-24.6461	139.9	4.09	18.08	16.5231	1	0	20	0	21	34
	Imbrium	14.838	14.578	1.9844	1.6181	1321	-17.4068	33.0763	35.5	3.87	18.5	18.3299	1	0	62	0	56	67
	Ingenii	11.243	11.353	0.21723	0.70643	342	163.681	-32.7751	510.8	4.28	15.71	11.1069	1	1	0	7	0	4
	Korolev	13.779	13.105	0.91069	1.3235	417.139	-157.47	-4.43504	160.1	4.11	16.0857	14.7097	1	0	0	2	0	16
	Lorentz	15.008	13.442	1.6136	0.55411	351	-97.0998	34.3268	295.2	4.2	15.755	13.1678	1	0	2	0	2	11
	Mendel-Rydberg	15.096	14.885	2.715	2.3895	635.875	-93.9192	-49.948	183.3	4.13	17.1794	15.2806	1	0	2	8	0	29
	Mendeleev	14.01	13.468	1.6918	1.6914	330.791	141.136	5.43747	183.3	4.13	15.654	14.1586	1	0	0	0	0	12
	Moscoviense	14.014	13.501	1.8229	1.4804	640	148.772	27.3812	510.8	4.09	17.2	11.3957	1	0	0	0	0	41
	Nectaris	13.093	13.973	2.5748	1.6656	914.999	34.6673	-14.3426	240.6	4.17	18.5	15.4464	1	0	33	0	12	40
	Nubium	13.521	14.048	3.1616	1.8858	835.45	-15.3725	-18.4983	628	4.31	18.1773	10	1	0	22	0	27	30
	Oirentale	15.053	15.188	2.1693	1.7555	928.473	-94.8629	-19.5715	23.4	3.81	18.5	18.5	1	0	15	7	5	61
	Planck	12.247	13.772	1.5484	1.212	320.524	135.092	-57.3536	183.3	4.13	15.6026	14.1209	1	1	1	6	0	5
	Poincare	NaN	NaN	NaN	NaN	311.641	163.153	-57.2836	362.5	4.23	15.5582	12.4408	1	1	0	11	0	0
	Schiller-Zucchius	13.878	13.299	2.7972	1.8783	361	-45.18	-55.72	388.2	4.24	15.805	12.3024	1	0	0	0	0	13
	Schrodinger	12.308	13.751	1.3306	1.2024	326	133.534	-74.9063	31.5	3.86	15.63	15.5546	1	1	4	0	9	1
	Serenitatis	15.737	15.891	1.2978	0.96569	923	18.8607	26.9084	338.5	4.22	18.5	14.07	1	0	43	0	35	20
	Smythii	14.224	13.706	1.6552	1.6051	886.977	86.8295	-1.81116	445.3	4.26	18.4349	12.5489	1	0	17	0	0	53
	South Pole-Aitken	13.665	13.639	2.2019	1.8454	2028	-169	-53	628	4.31	18.5	10	1	1	34	33	13	221
	Aestuum	NaN	NaN	NaN	NaN	330	-8.9	11.3	510.8	4.28	15.65	11.0952	0	0	5	0	12	0
	Asperitatis	13.88	14.617	2.3344	1.3998	730	26.8	-7.7	510.8	4.28	17.65	11.4829	0	0	27	0	10	20
	Australe	12.568	12.907	2.0262	1.4712	880	94.5	-51.5	510.8	4.28	18.4	11.6283	0	0	8	6	0	57
	Australe North	13.318	13.216	1.8118	1.4924	880	96	-35.5	510.8	4.28	18.4	11.6283	0	0	6	12	0	57
	Bailly	12.889	12.436	2.2972	1.4824	299.358	-68.7731	-67.1674	510.8	4.28	15.4968	11.0655	0	0	0	1	0	9
	Balmer-Kapteyn	14.837	15.06	1.1101	0.81065	300	69.64	-15.76	510.8	4.28	15.5	11.0662	0	0	1	0	0	8
	Bartles-V	15.138	13.489	1.1689	0.59036	290	-91.8	27.7	510.8	4.28	15.45	11.0565	0	0	1	0	1	8
	Belkovich	15.048	14.689	1.6492	1.09	204.083	90.2164	61.5612	510.8	4.28	15.0204	10.9732	0	0	0	0	0	5
	Campbell	14.605	13.868	1.6109	1.1052	237	152.875	45.4314	510.8	4.28	15.185	11.0051	0	0	0	0	0	5
	Clavius	10.903	12.021	1.4274	1.0462	220.531	-14.7672	-58.6773	510.8	4.28	15.1027	10.9891	0	0	0	0	0	4
	Copernicus-H	NaN	NaN	NaN	NaN	260	-18.2	7.2	510.8	4.28	15.3	11.0274	0	0	1	0	7	0
	Crisium-East	17.481	16.613	0.98645	0.45155	374	66	16.5	510.8	4.28	15.87	11.1379	0	0	0	0	0	15
	d’Alembert	12.541	12.213	1.6915	1.2002	231.696	164.836	51.0329	510.8	4.28	15.1585	11	0	0	0	0	0	6
	Deslandres	11.752	13.496	1.8039	1.1144	240	-5.33	-32.81	510.8	4.28	15.2	11.008	0	0	0	0	0	6
	Fecunditatis	15.003	15.181	1.871	1.1118	690	52	-4.6	510.8	4.28	17.45	11.4442	0	0	23	0	0	24
	Fermi	13.03	11.55	0.98736	0.62099	259	123.45	-19.77	510.8	4.28	15.295	11.0264	0	0	0	0	0	7
	Fowler-Charlier	12.045	12.117	1.165	0.8438	374	-142	39.5	510.8	4.28	15.87	11.1379	0	0	10	0	0	4
	Gagarin	11.699	11.418	0.58949	0.56425	265	149.24	-19.61	510.8	4.28	15.325	11.0322	0	0	0	0	0	7
	Galois	13.364	13.601	0.13754	0.38963	210.024	-152.955	-14.2323	510.8	4.28	15.0501	10.979	0	0	0	1	0	3
	Harkhebi	14.004	14.031	1.394	1.2301	280	98.62	40.03	510.8	4.28	15.4	11.0468	0	0	0	0	0	8
	Humboldt	13.392	13.864	1.0789	0.632	205.511	81.06	-27.12	510.8	4.28	15.0276	10.9746	0	0	0	0	0	4
	Iridum	NaN	NaN	NaN	NaN	252	-31.67	44.84	510.8	4.28	15.26	11.0196	0	0	4	0	4	0
	Janssen	12.036	13.074	2.0068	1.2238	229.961	40.639	-44.326	510.8	4.28	15.1498	10.9983	0	0	0	0	0	5
	Keeler-West	11.802	12.007	0.54588	0.65943	218.802	156.842	-10.107	510.8	4.28	15.094	10.9875	0	0	0	0	0	5
	Lamont	17.51	16.643	1.2292	0.25516	370	23.4	4.8	510.8	4.28	15.85	11.134	0	0	10	0	2	3
	Landau	13.252	12.93	0.89012	0.63449	236	-119.17	42.22	510.8	4.28	15.18	11.0041	0	0	0	0	0	5
	Leibnitz	NaN	NaN	NaN	NaN	247	179.23	-38.19	510.8	4.28	15.235	11.0148	0	1	0	4	0	0
	Medii	18.877	16.36	0	0	326	0.5	0.8	510.8	4.28	15.63	11.0914	0	0	0	5	0	6
	Milne	13.254	12.276	1.7208	0.47537	264	112.77	-31.25	510.8	4.28	15.32	11.0313	0	0	1	0	0	7
	Mutus-Vlacq	10.803	12.257	1.5158	1.3056	450	24	-53.5	510.8	4.28	16.25	11.2115	0	0	0	0	0	21
	Oppenheimer	NaN	NaN	NaN	NaN	205.593	-166.045	-35.3614	510.8	4.28	15.028	10.9747	0	1	1	4	0	0
	Orientale-Southwest	16.048	16.588	2.0823	1.6387	275.673	-108.525	-28.1065	510.8	4.28	15.3784	11.0426	0	0	1	0	0	7
	Pasteur	15.153	12.826	0.94594	0.92867	231	104.81	-11.46	510.8	4.28	15.155	10.9993	0	0	0	0	0	6
	Poczobutt	15.726	13.677	0.77231	0.33523	225	-99.59	57.68	510.8	4.28	15.125	10.9935	0	0	0	0	0	5
	Rupes Rectaa	12.65	14.092	0.93472	0.35829	211.558	-7.05471	-22.4848	510.8	4.28	15.0578	10.9804	0	0	1	0	2	3
	Schickard	16.903	15.418	1.6668	1.0467	223	-54.9952	-44.52	510.8	4.28	15.115	10.9915	0	0	0	0	0	5
	Schwartzchild	12.39	12.224	0.84936	1.2227	207.028	120.092	70.3552	510.8	4.28	15.0351	10.976	0	0	0	0	0	5
	Serenitatis-North	15.435	16.658	1.3057	0.34996	420	16.8	35.7	510.8	4.28	16.1	11.1825	0	0	12	0	9	3
	Sikorsky-Rittenhaus	12.912	14.005	1.0215	0.80306	282	109.71	-68.59	510.8	4.28	15.41	11.0487	0	1	0	2	0	6
	Szilard-North	12.993	13.037	1.0976	0.73664	200	105.229	34.5046	510.8	4.28	15	10.9692	0	0	0	0	0	4
	TOPO-13	11.21	11.381	0.22265	0.32951	220	147.4	-37.25	510.8	4.28	15.1	10.9886	0	0	0	2	0	2
	TOPO-22	12.767	12.502	2.065	1.5823	500	179	49.4	510.8	4.28	16.5	11.26	0	0	0	0	0	21
	Unnamed 1	13.595	12.478	1.4505	1.3181	241.645	167.821	-3.19569	510.8	4.28	15.2082	11.0096	0	0	0	0	0	6
	Unnamed 2	13.745	13.627	1.7791	1.6365	280	104.858	61.2341	510.8	4.28	15.4	11.0468	0	0	0	0	0	9
	Vaporum	17.686	16.608	1.6844	0.35002	410	3.1	14.2	510.8	4.28	16.05	11.1728	0	0	7	0	2	8
	Von Karman	NaN	NaN	NaN	NaN	255	176.24	-47.08	510.8	4.28	15.275	11.0225	0	1	0	6	0	0
	Wegener-Winlock	14.587	13.296	1.146	0.64469	205.005	-108.361	40.2149	510.8	4.28	15.025	10.9741	0	0	0	0	0	5

## Sheet: Dated basins
	Crater Name	Observed Mean Porosity (%)	Final Mean Model Porosity (%)	Observed Standard Deviation (%)	Model Standard Deviation (%)	Crater Diameter (km)	Long	Lat	Relative impact flux (~<3 Ga impact rate)	Crater count age	Size dependent model peak porosity (%)	Model Peak Porosity (%)	True crater count age (1: true; 0: assigned)	SP-A interior basins (1: true; 0: assigned)	Density gradient<5 kg m-3km-1	Inside SPA	Th>3.5PPM	Highlands
	Amundsen-Ganswindt	11.646	12.869	1.4571	1.6493	377	124.36	-80.59	445.3	4.26	15.885	11.7783	1	1	0	5	0	9
	Apollo	13.699	14.104	0.46841	0.57226	492	-151.48	-36.09	196.2	4.14	16.46	14.6137	1	1	1	17	0	8
	Birkhoff	12.954	12.451	1.4192	0.9629	334	-146.58	58.88	547.2	4.29	15.67	10.7578	1	0	0	0	0	9
	Coulomb-Sarton	13.101	12.589	1.8504	1.0552	672	-122.534	51.3098	362.5	4.23	17.36	13.232	1	0	1	0	2	41
	Crisium	14.661	14.514	1.6572	1.5114	1091.52	59.1674	17.1814	122.3	4.07	18.5	17.1096	1	0	35	0	15	68
	Crüger-Sirsalis	17.626	16.95	0.56386	0.33422	410	-66.0722	-15.9939	445.3	4.26	16.05	11.8282	1	0	10	0	10	2
	Dirichlet-Jackson	13.332	13.133	1.5087	1.405	452	-158.164	13.4308	362.5	4.23	16.26	12.749	1	0	0	0	0	19
	Fitzgerald-Jackson	13.395	12.97	2.0244	1.5013	564	-169.841	25.0696	445.3	4.26	16.82	12.0609	1	0	0	0	0	30
	Freundlich-Sharonov	14.127	13.398	1.9063	1.645	582.285	175.004	18.2871	196.2	4.14	16.9114	14.9361	1	0	0	0	0	35
	Grimaldi	15.756	15.886	2.7047	1.4134	460	-68.6893	-5.0077	196.2	4.14	16.3	14.4994	1	0	11	0	5	11
	Hertzsprung	13.653	14.314	1.7316	1.986	549.393	-129.157	2.0184	139.9	4.09	16.747	15.4469	1	0	0	0	0	30
	Humboldtianum	14.288	14.194	1.7101	1.8172	603.126	81.8853	57.1065	130.8	4.08	17.0156	15.7694	1	0	1	0	2	33
	Humorum	14.565	14.698	2.9345	1.9944	816	-39.6967	-24.6461	139.9	4.09	18.08	16.5231	1	0	20	0	21	34
	Imbrium	14.838	14.578	1.9844	1.6181	1321	-17.4068	33.0763	35.5	3.87	18.5	18.3299	1	0	62	0	56	67
	Ingenii	11.243	11.353	0.21723	0.70643	342	163.681	-32.7751	510.8	4.28	15.71	11.1069	1	1	0	7	0	4
	Korolev	13.779	13.105	0.91069	1.3235	417.139	-157.47	-4.43504	160.1	4.11	16.0857	14.7097	1	0	0	2	0	16
	Lorentz	15.008	13.442	1.6136	0.55411	351	-97.0998	34.3268	295.2	4.2	15.755	13.1678	1	0	2	0	2	11
	Mendel-Rydberg	15.096	14.885	2.715	2.3895	635.875	-93.9192	-49.948	183.3	4.13	17.1794	15.2806	1	0	2	8	0	29
	Mendeleev	14.01	13.468	1.6918	1.6914	330.791	141.136	5.43747	183.3	4.13	15.654	14.1586	1	0	0	0	0	12
	Moscoviense	14.014	13.501	1.8229	1.4804	640	147.05	26.0856	139.9	4.09	17.2	15.8126	1	0	0	0	0	16
	Nectaris	13.093	13.973	2.5748	1.6656	914.999	34.6673	-14.3426	240.6	4.17	18.5	15.4464	1	0	33	0	12	40
	Nubium	13.521	14.048	3.1616	1.8858	835.45	-15.3725	-18.4983	628	4.31	18.1773	10	1	0	22	0	27	30
	Oirentale	15.053	15.188	2.1693	1.7555	928.473	-94.8629	-19.5715	23.4	3.81	18.5	18.5	1	0	15	7	5	61
	Planck	12.247	13.772	1.5484	1.212	320.524	135.092	-57.3536	183.3	4.13	15.6026	14.1209	1	1	1	6	0	5
	Poincare	NaN	NaN	NaN	NaN	311.641	163.153	-57.2836	362.5	4.23	15.5582	12.4408	1	1	0	11	0	0
	Schiller-Zucchius	13.878	13.299	2.7972	1.8783	361	-45.18	-55.72	388.2	4.24	15.805	12.3024	1	0	0	0	0	13
	Schrodinger	12.308	13.751	1.3306	1.2024	326	133.534	-74.9063	31.5	3.86	15.63	15.5546	1	1	4	0	9	1
	Serenitatis	15.737	15.891	1.2978	0.96569	923	18.8607	26.9084	338.5	4.22	18.5	14.07	1	0	43	0	35	20
	Smythii	14.224	13.706	1.6552	1.6051	886.977	86.8295	-1.81116	445.3	4.26	18.4349	12.5489	1	0	17	0	0	53
	South Pole-Aitken	13.665	13.639	2.2019	1.8454	2028	-169	-53	628	4.31	18.5	10	1	1	34	33	13	221

## Sheet: Undated basins
	Crater Name	Observed Mean Porosity (%)	Final Mean Model Porosity (%)	Observed Standard Deviation (%)	Model Standard Deviation (%)	Crater Diameter (km)	Long	Lat	Relative impact flux (~<3 Ga impact rate)	Crater count age	Size dependent model peak porosity (%)	Model Peak Porosity (%)	True crater count age (1: true; 0: assigned)	SP-A interior basins (1: true; 0: assigned)	Density gradient<5 kg m-3km-1	Inside SPA	Th>3.5PPM	Highlands
	Aestuum	NaN	NaN	NaN	NaN	330	-8.9	11.3	510.8	4.28	15.65	11.0952	0	0	5	0	12	0
	Asperitatis	13.88	14.617	2.3344	1.3998	730	26.8	-7.7	510.8	4.28	17.65	11.4829	0	0	27	0	10	20
	Australe	12.568	12.907	2.0262	1.4712	880	94.5	-51.5	510.8	4.28	18.4	11.6283	0	0	8	6	0	57
	Australe North	13.318	13.216	1.8118	1.4924	880	96	-35.5	510.8	4.28	18.4	11.6283	0	0	6	12	0	57
	Bailly	12.889	12.436	2.2972	1.4824	299.358	-68.7731	-67.1674	510.8	4.28	15.4968	11.0655	0	0	0	1	0	9
	Balmer-Kapteyn	14.837	15.06	1.1101	0.81065	300	69.64	-15.76	510.8	4.28	15.5	11.0662	0	0	1	0	0	8
	Bartles-V	15.138	13.489	1.1689	0.59036	290	-91.8	27.7	510.8	4.28	15.45	11.0565	0	0	1	0	1	8
	Belkovich	15.048	14.689	1.6492	1.09	204.083	90.2164	61.5612	510.8	4.28	15.0204	10.9732	0	0	0	0	0	5
	Campbell	14.605	13.868	1.6109	1.1052	237	152.875	45.4314	510.8	4.28	15.185	11.0051	0	0	0	0	0	5
	Clavius	10.903	12.021	1.4274	1.0462	220.531	-14.7672	-58.6773	510.8	4.31	15.1027	10.9891	0	0	0	0	0	4
	Copernicus-H	NaN	NaN	NaN	NaN	260	-18.2	7.2	510.8	4.28	15.3	11.0274	0	0	1	0	7	0
	Crisium-East	17.481	16.613	0.98645	0.45155	374	66	16.5	510.8	4.28	15.87	11.1379	0	0	0	0	0	15
	d’Alembert	12.541	12.213	1.6915	1.2002	231.696	164.836	51.0329	510.8	4.28	15.1585	11	0	0	0	0	0	6
	Deslandres	11.752	13.496	1.8039	1.1144	240	-5.33	-32.81	510.8	4.31	15.2	11.008	0	0	0	0	0	6
	Fecunditatis	15.003	15.181	1.871	1.1118	690	52	-4.6	510.8	4.28	17.45	11.4442	0	0	23	0	0	24
	Fermi	13.03	11.55	0.98736	0.62099	259	123.45	-19.77	510.8	4.28	15.295	11.0264	0	0	0	0	0	7
	Fowler-Charlier	12.045	12.117	1.165	0.8438	374	-142	39.5	510.8	4.28	15.87	11.1379	0	0	10	0	0	4
	Gagarin	11.699	11.418	0.58949	0.56425	265	149.24	-19.61	510.8	4.28	15.325	11.0322	0	0	0	0	0	7
	Galois	13.364	13.601	0.13754	0.38963	210.024	-152.955	-14.2323	510.8	4.28	15.0501	10.979	0	0	0	1	0	3
	Harkhebi	14.004	14.031	1.394	1.2301	280	98.62	40.03	510.8	4.28	15.4	11.0468	0	0	0	0	0	8
	Humboldt	13.392	13.864	1.0789	0.632	205.511	81.06	-27.12	510.8	4.28	15.0276	10.9746	0	0	0	0	0	4
	Iridum	NaN	NaN	NaN	NaN	252	-31.67	44.84	510.8	4.28	15.26	11.0196	0	0	4	0	4	0
	Janssen	12.036	13.074	2.0068	1.2238	229.961	40.639	-44.326	510.8	4.31	15.1498	10.9983	0	0	0	0	0	5
	Keeler-West	11.802	12.007	0.54588	0.65943	218.802	156.842	-10.107	510.8	4.28	15.094	10.9875	0	0	0	0	0	5
	Lamont	17.51	16.643	1.2292	0.25516	370	23.4	4.8	510.8	4.28	15.85	11.134	0	0	10	0	2	3
	Landau	13.252	12.93	0.89012	0.63449	236	-119.17	42.22	510.8	4.28	15.18	11.0041	0	0	0	0	0	5
	Leibnitz	NaN	NaN	NaN	NaN	247	179.23	-38.19	510.8	4.28	15.235	11.0148	0	1	0	4	0	0
	Medii	18.877	16.36	0	0	326	0.5	0.8	510.8	4.28	15.63	11.0914	0	0	0	5	0	6
	Milne	13.254	12.276	1.7208	0.47537	264	112.77	-31.25	510.8	4.28	15.32	11.0313	0	0	1	0	0	7
	Mutus-Vlacq	10.803	12.257	1.5158	1.3056	450	24	-53.5	510.8	4.31	16.25	11.2115	0	0	0	0	0	21
	Oppenheimer	NaN	NaN	NaN	NaN	205.593	-166.045	-35.3614	510.8	4.28	15.028	10.9747	0	1	1	4	0	0
	Orientale-Southwest	16.048	16.588	2.0823	1.6387	275.673	-108.525	-28.1065	510.8	4.28	15.3784	11.0426	0	0	1	0	0	7
	Pasteur	15.153	12.826	0.94594	0.92867	231	104.81	-11.46	510.8	4.28	15.155	10.9993	0	0	0	0	0	6
	Poczobutt	15.726	13.677	0.77231	0.33523	225	-99.59	57.68	510.8	4.28	15.125	10.9935	0	0	0	0	0	5
	Rupes Rectaa	12.65	14.092	0.93472	0.35829	211.558	-7.05471	-22.4848	510.8	4.31	15.0578	10.9804	0	0	1	0	2	3
	Schickard	16.903	15.418	1.6668	1.0467	223	-54.9952	-44.52	510.8	4.28	15.115	10.9915	0	0	0	0	0	5
	Schwartzchild	12.39	12.224	0.84936	1.2227	207.028	120.092	70.3552	510.8	4.28	15.0351	10.976	0	0	0	0	0	5
	Serenitatis-North	15.435	16.658	1.3057	0.34996	420	16.8	35.7	510.8	4.31	16.1	11.1825	0	0	12	0	9	3
	Sikorsky-Rittenhaus	12.912	14.005	1.0215	0.80306	282	109.71	-68.59	510.8	4.28	15.41	11.0487	0	1	0	2	0	6
	Szilard-North	12.993	13.037	1.0976	0.73664	200	105.229	34.5046	510.8	4.28	15	10.9692	0	0	0	0	0	4
	TOPO-13	11.21	11.381	0.22265	0.32951	220	147.4	-37.25	510.8	4.28	15.1	10.9886	0	0	0	2	0	2
	TOPO-22	12.767	12.502	2.065	1.5823	500	179	49.4	510.8	4.28	16.5	11.26	0	0	0	0	0	21
	Unnamed 1	13.595	12.478	1.4505	1.3181	241.645	167.821	-3.19569	510.8	4.28	15.2082	11.0096	0	0	0	0	0	6
	Unnamed 2	13.745	13.627	1.7791	1.6365	280	104.858	61.2341	510.8	4.28	15.4	11.0468	0	0	0	0	0	9
	Vaporum	17.686	16.608	1.6844	0.35002	410	3.1	14.2	510.8	4.28	16.05	11.1728	0	0	7	0	2	8
	Von Karman	NaN	NaN	NaN	NaN	255	176.24	-47.08	510.8	4.28	15.275	11.0225	0	1	0	6	0	0
	Wegener-Winlock	14.587	13.296	1.146	0.64469	205.005	-108.361	40.2149	510.8	4.28	15.025	10.9741	0	0	0	0	0	5

## Sheet: Chi-squared 
Basin name	Obs. age	Model age	Model age min	Model age max	True crater count age (1: true; 0: assigned)	SP-A interior basins (1: true; 0: assigned)	Odd Por.	# of pixels inside density gradient<5 kg m-3km-1	# of pixels inside SPA	# of pixels for thorium >3.5PPM	# of pixels in highlands	Observed Asymetry in GRAIL-derived porosity distribution?	Other notes	Stratigraphy Older than	Stratigraphy Younger than
Amundsen-Ganswindt	4.26	4.31	4.23	4.31	1	1	0	0	5	0	9			Schrödinger1,2
Apollo	4.14	4.15	3.81	4.31	1	1	0	1	17	0	8	? Inside of SPA		Orientale1, Hertzsprung1,2, Korolev1,2	SP-A1
Birkhoff	4.29	4.23	4.06	4.31	1	0	1	0	0	0	9			Imbrium1, Hertzsprung1	Coulobm-Sarton1,2, Lorentz1
Coulomb-Sarton	4.23	4.19	4.16	4.23	1	0	1	1	0	2	41			Orientale1, Imbrium1, Hertzsprung1, Lorentz1, Birkhoff1,2
Crisium	4.07	4.09	3.99	4.12	1	0	0	35	0	15	68	? Inside of PKT		Imbrium1, Serenitatis1, Humboldtianum2	Humboldtianum1, Smythii1, Fecunditatis1
Crüger-Sirsalis	4.26	4.09	3.81	4.31	1	0	0	10	0	10	2
Dirichlet-Jackson	4.23	4.3	4.22	4.31	1	0	0	0	0	0	19			Korolev2
Fitzgerald-Jackson	4.26	4.31	4.25	4.31	1	0	0	0	0	0	30			Freundlich-Sharonov2
Freundlich-Sharonov	4.14	4.03	3.81	4.16	1	0	0	0	0	0	35	Yes, and constrains the impact to come from ESE (105°)		Moscoviense1,2, Korolev1, Mendeleev1	Fitzgerald-Jackson2
Grimaldi	4.14	4.18	3.81	4.31	1	0	0	11	0	5	11			Orientale1, Mendel-Rydberg2
Hertzsprung	4.09	4.24	4.18	4.28	1	0	0	0	0	0	30	Questionable but near Orientale	Looks like the N(20) #s are influenced by Orentale and are WORNG	Orientale1	Birkhoff1, Lorentz1, Coulomb-Sarton1, Apollo1,2, Korolev1,2, SP-A1
Humboldtianum	4.08	4.16	3.98	4.22	1	0	0	1	0	2	33	Yes, and consistant with impact from NNW		Imbrium1, Crisium1, Serenitatis1	Moscoviense1, Crisium2
Humorum	4.09	4.06	3.81	4.16	1	0	0	20	0	21	34	? Inside of PKT		Orientale1, Imbrium1	Nubium1,2, Schiller-Zucchius1
Imbrium	3.87	3.81	3.81	4.05	1	0	0	62	0	56	67	? Inside of PKT			Crisium1, Humorum1, Nectaris1, Serenitatis1, Coulomb-Sarton1, Birkhoff1, Nubium1
Ingenii	4.28	4.23	3.81	4.31	1	1	0	0	7	0	4				SP-A1
Korolev	4.11	4.15	3.9	4.22	1	0	0	0	2	0	16	Not obvious		Orientale1, Hertzsprung1,2	Freundlich-Sharonov1, Apollo1,2, SP-A1, Dirichlet-Jackson2
Lorentz	4.2	3.87	3.81	4.12	1	0	1	2	0	2	11			Orientale1, Imbrium1, Birkhoff1	Coulobm-Sarton1
Mendel-Rydberg	4.13	4.27	4.22	4.31	1	0	0	2	8	0	29			Orientale1	SP-A1, Grimaldi2
Mendeleev	4.13	4.13	3.81	4.27	1	0	0	0	0	0	12				Moscoviense1, Freundlich-Sharonov1
Moscoviense	4.09	3.87	3.81	4.05	1	0	0	0	0	0	41	Yes, and consistant with impact from the E		Humdoltianum1, Mendeleev1	Freundlich-Sharonov1,2
Nectaris	4.17	4.25	4.21	4.27	1	0	0	33	0	12	40	? Inside of PKT	Inside PKT	Imbrium1	Mutus-Vlaq1, Fecunditatis1, Australe1, SP-A1, Serenitatis2
Nubium	4.31	4.31	4.28	4.31	1	0	0	22	0	27	30			Imbrium1, Humorum1,2
Planck	4.13	4.28	4.12	4.31	1	1	0	1	6	0	5				SP-A1, Poincare1
Poincare	4.23	3.81	3.81	4.31	1	1	0	0	11	0	0			Planck1, Schrödinger1	SP-A1
Schiller-Zucchius	4.24	4.23	3.94	4.31	1	0	0	0	0	0	13			Orientale1, Humorum1
Schrodinger	3.86	4.21	3.99	4.31	1	1	0	4	0	9	1	? Inside of SPA	Inside SPA (page 65 in Wihlem, A-G is buried by Schrödinger's ejecta)	Orientale1	Sikorsky-Rittenhaus1, Amundsen-Ganswindt1,2, Poincare1,2, Planck1,2, SP-A1
Serenitatis	4.22	4.31	4.06	4.31	1	0	0	43	0	35	20		No Crisium ejecta or secondaries are found, if Crisium's ejecta is not highly asymmetric (page 173 in Wilhem book)	Imbrium1, Nectaris2	Crisium1, Humdoltianum1
Smythii	4.26	4.18	4.13	4.21	1	0	1	17	0	0	53			Crisium1,2
Aestuum		3.81	3.81	4.31	0	0	0	5	0	12	0
Asperitatis		4.31	4.23	4.31	0	0	0	27	0	10	20
Australe		4.27	4.25	4.31	0	0	0	8	6	0	57
Australe-North		4.23	4.21	4.25	0	0	0	6	12	0	57
Bailly		4.31	4.23	4.31	0	0	0	0	1	0	9
Balmer-Kapteyn		4.25	3.81	4.31	0	0	0	1	0	0	8
Bartles-V		3.87	3.81	4.17	0	0	1	1	0	1	8
Belkovich		4.28	3.81	4.31	0	0	0	0	0	0	5
Campbell		4.18	3.81	4.31	0	0	0	0	0	0	5
Clavius		4.31	4.25	4.31	0	0	0	0	0	0	4
Copernicus-H		3.81	3.81	4.31	0	0	0	1	0	7	0
Crisium-East		4.07	3.81	4.31	0	0	0	0	0	0	15
d-Alembert		4.28	4.05	4.31	0	0	0	0	0	0	6
Deslandres		4.31	4.24	4.31	0	0	0	0	0	0	6
Fecunditatis		4.31	4.03	4.31	0	0	0	23	0	0	24
Fermi		3.97	3.81	4.21	0	0	1	0	0	0	7
Fowler-Charlier		4.31	4.22	4.31	0	0	0	10	0	0	4
Gagarin		4.24	4.1	4.31	0	0	0	0	0	0	7
Galois		4.31	3.81	4.31	0	0	0	0	1	0	3
Harkhebi		4.31	3.81	4.31	0	0	0	0	0	0	8
Humboldt		4.24	3.81	4.31	0	0	0	0	0	0	4
Iridum		3.81	3.81	4.31	0	0	0	4	0	4	0
Janssen		4.31	4.06	4.31	0	0	0	0	0	0	5
Keeler-West		4.23	4.02	4.31	0	0	0	0	0	0	5
Lamont		3.87	3.81	4.31	0	0	0	10	0	2	3
Landau		4.09	3.81	4.31	0	0	0	0	0	0	5
Leibnitz		3.81	3.81	4.31	0	1	0	0	4	0	0
Medii		3.87	3.81	4.31	0	0	0	0	5	0	6
Milne		4.09	3.81	4.31	0	0	0	1	0	0	7
Mutus-Vlacq		4.31	4.3	4.31	0	0	0	0	0	0	21
Oppenheimer		3.81	3.81	4.31	0	1	0	1	4	0	0
Orientale-Southwest		4.31	3.81	4.31	0	0	0	1	0	0	7
Pasteur		3.81	3.81	4.17	0	0	1	0	0	0	6
Poczobutt		3.87	3.81	4.25	0	0	1	0	0	0	5
Rupes-Rectaa		4.31	3.81	4.31	0	0	0	1	0	2	3
Schickard		4.13	3.81	4.31	0	0	0	0	0	0	5
Schwartzchild		4.31	3.81	4.31	0	0	0	0	0	0	5
Serenitatis-North		3.81	3.81	4.31	0	0	0	12	0	9	3
Sikorsky-Rittenhaus		4.12	3.81	4.31	0	1	0	0	2	0	6
Szilard-North		4.31	3.81	4.31	0	0	0	0	0	0	4
TOPO-13		4.26	3.81	4.31	0	0	0	0	2	0	2
TOPO-22		4.29	4.25	4.31	0	0	0	0	0	0	21
Unnamed-3		3.96	3.81	4.28	0	0	0	0	0	0	6
Unnamed-4		4.31	3.81	4.31	0	0	0	0	0	0	9
Vaporum		3.87	3.81	4.31	0	0	0	7	0	2	8
Von-Karman		3.81	3.81	4.31	0	1	0	0	6	0	0
Wegener-Winlock		3.87	3.81	4.31	0	0	0	0	0	0	5
1Wilhelms et al., 1987 2Fassett et al., 2012
