# Supplementary material for: Crustal porosity reveals the bombardment history of the Moon
Source: Research Square preprint supplement (doi:10.21203/rs.3.rs-98852/v1), 2021-01-06
Supplement: Supplementary file 3 [file ff67f464a4bd7639cf4b3d50.xlsx]

## Sheet: LolaLargeLunarCraterCatalog_upd
53.2904	-56.6955	20.0029
64.697	-45.287	20.0044
37.8045	-32.1434	20.018
114.218	52.8966	20.0218
46.9177	-45.7431	20.0252
117.393	-19.7914	20.0261
-67.4327	-38.7221	20.0267
-60.6641	-61.2005	20.028
15.9386	-57.1912	20.03
-10.4324	-35.608	20.032
84.1708	-20.7057	20.0368
-88.1923	36.9215	20.0382
-107.706	68.3748	20.0402
-20.6179	40.343	20.042
155.748	-51.2656	20.0475
157.415	1.53926	20.0488
-105.598	-71.7028	20.051
-31.7703	-53.0212	20.0537
107.841	-1.91972	20.0597
149.235	-60.6032	20.0709
-119.207	11.7258	20.0903
-162.896	44.6307	20.0968
-132.608	36.9518	20.0972
147.008	-32.5343	20.109
16.2676	-50.8797	20.1257
0.484811	-84.6785	20.1316
-166.443	-17.4011	20.1336
-78.4672	54.8382	20.1341
-83.0304	52.5247	20.1355
50.7412	-34.7795	20.1362
101.474	-38.0965	20.1364
-36.3587	-34.3526	20.1522
91.0989	4.62132	20.1558
-48.5701	-32.2249	20.1589
-75.3859	-74.3531	20.1603
116.859	-1.15386	20.1614
-50.4434	-19.1334	20.1703
178.78	52.4324	20.1763
-46.0213	-74.3149	20.1835
45.0269	36.6597	20.1868
110.397	35.6312	20.2064
-173.351	37.7139	20.209
167.522	65.9041	20.21
-22.1768	-44.6888	20.2153
117.557	-19.4305	20.2154
-177.169	-79.7048	20.2178
100.998	-16.8609	20.2195
-60.3634	-19.699	20.221
-85.9329	34.7622	20.2226
22.7012	-54.3062	20.2237
95.8738	-68.6458	20.2312
-165.221	37.2173	20.2435
1.90524	-43.3853	20.2456
-177.301	-18.0644	20.2458
-100.084	38.9089	20.2458
135.609	54.6404	20.2503
-134.274	45.8974	20.2506
151.931	63.0086	20.2554
-147.385	-15.139	20.2584
-8.45851	-33.9105	20.2616
151.154	56.7803	20.2648
78.502	4.21688	20.2798
58.3826	-42.8609	20.2841
-127.205	-56.1924	20.285
-85.2137	0.0741623	20.3034
130.16	53.742	20.3101
167.411	50.7092	20.3118
125.271	-64.0343	20.3128
50.0486	66.4282	20.3176
-67.7021	31.8461	20.3253
42.0879	36.7501	20.3253
-73.7929	67.1569	20.3294
-151.9	20.1063	20.333
83.769	9.91274	20.3381
-63.8059	-24.506	20.3456
45.3423	-46.4718	20.3509
-124.89	35.6161	20.352
64.936	70.0901	20.3568
-168.969	21.122	20.3629
136.464	-7.97448	20.3635
34.3755	-43.1496	20.3827
-137.217	34.6427	20.3829
51.694	-14.8656	20.3846
2.1741	7.96537	20.3857
-141.693	-10.7407	20.3919
-88.5796	-50.1306	20.3926
-86.1729	52.0022	20.3932
60.2231	-29.4734	20.417
-51.1357	87.9643	20.4269
137.068	52.8074	20.4286
129.139	56.9983	20.4358
-118.679	-20.9309	20.4429
-155.29	48.2948	20.4464
-146.49	-6.41775	20.4469
-59.1839	-47.0835	20.4505
4.98852	-52.9345	20.4593
74.9632	26.2505	20.4635
17.1476	15.0393	20.4679
66.4094	-4.05338	20.4858
170.292	47.3489	20.4868
-139.013	4.61946	20.4983
-161.152	19.9035	20.5284
-21.5976	-34.8019	20.5313
174.764	-48.0883	20.5326
-114.768	17.2933	20.5346
-41.7216	-70.6337	20.5371
-47.805	-31.6337	20.5382
91.8077	-31.5943	20.5392
-159.576	-48.6257	20.5462
60.0192	-31.5575	20.5484
102.417	-57.082	20.5571
57.1021	23.9605	20.5588
-171.069	-40.3116	20.5599
171.082	11.2489	20.5744
176.334	-39.5812	20.5854
-141.127	-10.1817	20.5861
2	-35.8001	20.5919
-76.7	6.80002	20.5919
-172.1	13.5	20.5919
-83.3	25.2001	20.5919
-125.142	-1.28916	20.592
143.489	-18.7359	20.5959
-142.887	15.3155	20.5961
-114.665	28.6517	20.5985
-121.7	24.6941	20.6007
-148	-7.5195	20.6012
142.715	-55.0718	20.6014
-74.706	-42.0396	20.6018
-149.13	-8.83494	20.6053
-93.5899	11.9899	20.6085
-129.73	-50.3094	20.6117
-104.3	50.9094	20.6121
66.638	-49.8294	20.6149
-137.294	79.5038	20.6159
-107.854	36.9882	20.6208
-148.31	29.9227	20.621
28.5137	-4.70451	20.624
-138.074	40.8137	20.6261
-124.718	32.3519	20.6319
156.526	59.6258	20.632
51.9296	-28.6145	20.6422
-75.9935	-71.2071	20.6472
124.833	1.23413	20.6498
135.486	-46.4478	20.6607
-114.366	59.2732	20.6611
-141.156	22.27	20.6612
-1.05088	-31.0469	20.6641
-141.778	68.1634	20.6672
-83.144	-53.4828	20.6678
-1.66755	-49.4291	20.6703
-21.7377	-44.097	20.6715
-114.378	-65.3187	20.6791
-130.23	27.371	20.6862
130.117	-39.0038	20.692
74.8413	-51.1241	20.6951
174.145	39.1655	20.698
126.926	57.6447	20.706
9.42683	-13.2382	20.7073
16.1338	-20.6554	20.7109
74.8525	-41.4363	20.7145
-168.464	69.7278	20.725
158.709	2.33537	20.7261
91.2503	9.56531	20.7268
-69.5812	-53.9592	20.727
123.297	49.7498	20.7386
21.4388	-40.9278	20.7463
28.0352	-45.6434	20.755
-27.5658	-55.3115	20.7689
-174.659	8.29883	20.7741
33.2429	-33.9654	20.7788
-83.8354	4.33604	20.7798
-100.6	34.4775	20.7845
-82.0525	13.1235	20.7856
121.584	50.0431	20.7862
-158.362	22.3977	20.8013
136.275	56.7643	20.8063
76.6835	43.5858	20.8145
128.476	-89.6919	20.8164
-113.057	15.9256	20.823
-156.125	71.9698	20.824
172.328	38.6089	20.8282
-128.842	-62.9842	20.8315
-135.674	49.041	20.833
-145.879	-21.2352	20.8342
153.615	73.5791	20.8367
34.4333	-68.6594	20.8417
41.8981	35.9616	20.842
-156.699	47.483	20.843
-4.99747	-21.5952	20.8467
-150.286	-53.4011	20.8505
88.049	35.2521	20.8536
-141.416	-49.8088	20.8688
158.443	63.3841	20.8752
-61.6534	-72.4205	20.8784
109.429	-49.9866	20.8887
67.7262	26.4056	20.8971
-29.8251	-47.9365	20.8985
132.628	49.2962	20.9095
-179.899	-60.0709	20.917
10.4606	-60.8846	20.9232
64.9722	-64.4943	20.9304
-111.816	18.153	20.9338
168.073	67.977	20.936
83.4492	41.4086	20.9365
-67.5219	-61.1599	20.9372
-127.621	-25.7881	20.945
-161.399	77.6043	20.9595
95.2898	-12.7314	20.972
18.9414	-5.41386	20.9799
93.0027	-26.2098	20.9864
72.8456	47.3521	20.9905
40.5255	13.5741	20.9967
26.3854	-39.9273	20.9971
-157.506	-39.7664	21.0097
-26.2922	-41.527	21.0104
-93.5124	-78.371	21.0204
-67.9162	-51.2954	21.0214
26.4903	-49.1373	21.0259
-95.8112	47.5318	21.0334
22.2062	-24.0808	21.0338
-91.8345	13.811	21.0444
16.1144	-55.1705	21.054
157.789	66.0298	21.0547
136.165	-0.961846	21.058
51.6752	-44.8227	21.0587
82.289	-52.3808	21.0633
84.9744	30.9065	21.0817
102.756	35.8834	21.0843
1.35354	7.67922	21.0878
75.0927	41.7738	21.0936
109.08	9.93037	21.1067
-90.8672	-42.0955	21.1231
90.4622	-4.71645	21.1283
100.853	2.99325	21.1475
1.96124	21.6664	21.1565
-158.737	-65.4738	21.1584
-92.1814	67.8561	21.1666
105.792	61.1233	21.1711
-156.359	0.532496	21.1756
67.9425	-50.6176	21.1776
-78.2345	26.3907	21.1778
57.1926	-34.8446	21.1786
-79.7161	60.9544	21.185
22.7104	-38.9378	21.1912
7.31621	56.0233	21.199
-132.57	-35.3332	21.1993
74.4072	26.2601	21.2082
-117.77	-1.27788	21.209
66.8803	-45.0119	21.2254
129.16	-54.023	21.2289
8.64636	-33.142	21.2309
52.6826	-39.0875	21.2401
146.057	61.4436	21.2409
-66.1974	-51.4826	21.2418
-86.6273	65.2019	21.2505
129.875	52.0154	21.2517
51.1859	-14.2021	21.2591
43.5637	2.37258	21.261
-94.3343	38.8566	21.2681
169.361	11.4176	21.2695
-128.233	-10.0581	21.274
96.097	-29.9605	21.2749
-39.8531	-78.5527	21.2987
112.933	41.5214	21.3
144.965	54.2082	21.302
-102.866	60.8752	21.3071
124.899	33.9351	21.314
-114.486	62.8377	21.3169
-45.9888	-50.2739	21.3182
78.8365	-1.07841	21.3253
-128.532	-25.575	21.3284
85.5966	27.0713	21.3336
61.9527	76.861	21.3363
-167.37	7.2702	21.3495
127.625	44.6567	21.3509
-124.751	48.4746	21.3569
57.1406	80.6415	21.3596
70.2149	78.578	21.3604
-83.6769	6.4427	21.3618
81.1118	49.5302	21.3668
10.4076	-22.7955	21.3862
-141.767	-29.306	21.3989
-146.551	35.0528	21.4017
-153.675	-65.6241	21.4045
106.058	-11.8549	21.4077
115.511	13.9188	21.4088
-128.178	14.9126	21.4162
113.67	21.431	21.4162
-63.9652	-10.3017	21.4173
-22.1601	-45.8978	21.4203
56.9241	-56.3993	21.425
-103.514	17.9664	21.4294
28.2476	-48.7295	21.4316
40.8381	31.4678	21.4351
-29.8548	-35.4029	21.4595
-174.713	30.0804	21.4694
60.8432	36.3879	21.4732
-163.006	43.9765	21.4793
-90.0324	65.9479	21.4809
10.7701	-77.0793	21.4864
-85.0049	51.6864	21.487
-44.3374	-4.48777	21.4901
-40.7344	-45.4569	21.4913
74.8431	78.3766	21.4932
32.4862	-55.8026	21.5017
116.518	33.9514	21.502
122.266	26.8136	21.5054
118.035	34.6768	21.5114
83.617	-30.7737	21.5301
36.0612	-56.7833	21.5323
39.7773	30.2932	21.546
167.128	68.4387	21.5467
135.006	51.117	21.5683
97.9084	-4.39503	21.5721
-151.628	28.3343	21.5788
-3.46579	-37.2866	21.5824
42.8063	-10.944	21.583
-154.499	15.854	21.5838
146.123	81.7027	21.588
144.291	51.5924	21.6017
-117.576	-40.0793	21.6096
136.16	-48.2769	21.6106
129.239	52.1151	21.6114
152.64	-1.88902	21.6234
9.84493	0.130855	21.6267
-97.9873	37.9946	21.6276
-79.8271	9.01275	21.6309
-130.193	-0.151413	21.6313
-104.891	27.6001	21.6313
-176.24	0.98591	21.6314
40.3268	19.5549	21.6338
-156.311	-3.64633	21.6344
-106.182	16.2395	21.6346
-157.827	-4.11815	21.6353
-128.06	24.0941	21.6403
-5.85778	-30.0057	21.6414
-128.939	-56.0549	21.6441
-131.522	-63.0702	21.6457
-136.488	23.1184	21.646
-139.654	33.579	21.6465
-16.1826	67.5807	21.6482
-150.472	-11.9209	21.6508
-157.334	-25.7323	21.6558
74.6418	39.259	21.6576
43.31	7.34054	21.6604
-115.215	34.273	21.6606
54.5945	28.601	21.6606
-92.7433	52.4184	21.6639
103.294	-10.6424	21.6752
-25.1977	-39.1521	21.6755
-172.962	38.9477	21.6874
-29.78	-21.0991	21.6929
-36.3163	-54.678	21.6938
-168.551	-47.3261	21.6944
-137.2	-17.6292	21.6979
-77.3803	-60.9694	21.6988
-114.318	22.3867	21.7097
-172.96	75.821	21.7133
-129.529	22.3462	21.7333
28.0693	-42.9178	21.7344
148.822	35.007	21.7426
128.69	80.5666	21.7436
138.859	34.0703	21.7482
33.2364	-42.8672	21.7567
135.638	48.3836	21.7656
171.858	39.592	21.7685
-123.877	-38.8554	21.7708
79.4544	-56.7044	21.7732
-116.723	32.441	21.7744
-112.512	26.7457	21.7768
-137.853	-63.3761	21.7791
-144.296	-39.74	21.7814
103.285	-24.6987	21.7868
121.191	17.3339	21.7891
-87.001	-50.77	21.7918
0.527163	-55.4474	21.7925
-155.71	2.9615	21.7964
57.7184	-33.7226	21.8005
-85.5054	-57.6226	21.8067
-9.21005	-48.4726	21.8098
144.383	57.9995	21.8186
-10.8084	-38.0048	21.819
95.5659	-54.4135	21.819
120.415	-23.2063	21.8263
159.799	-34.725	21.8269
-90.9425	12.3992	21.8293
76.4337	-61.0516	21.8294
50.138	10.0861	21.831
-134.055	47.4226	21.8421
-151.414	-24.6755	21.8485
-128.695	21.4774	21.8574
-131.112	23.4001	21.8581
49.506	45.3358	21.8599
178.042	14.0368	21.8612
85.6535	46.9701	21.8648
168.105	52.6204	21.8699
-93.6006	79.5237	21.8772
123.474	-37.0384	21.8803
30.9659	-80.0683	21.8819
-138.324	39.0924	21.8828
-64.5477	-71.0663	21.8849
-173.003	57.8952	21.8857
52.5981	-31.1096	21.8866
67.308	-8.67979	21.8876
97.1305	-33.1528	21.8918
57.6193	-36.9551	21.8936
116.675	31.5704	21.8945
-135.524	-54.6599	21.8995
64.3734	-44.8671	21.9006
75.2959	7.02587	21.9033
-133.735	48.3105	21.9233
-155.644	20.6052	21.9234
-26.401	-36.4141	21.9252
-167.235	23.7892	21.9257
-30.4126	-40.9042	21.9295
-67.7472	-51.5357	21.9332
-110.207	15.2711	21.9343
152.749	12.9184	21.9385
-124.225	-32.2251	21.9401
51.0033	-28.3154	21.9453
28.6822	13.5589	21.955
-8.64834	-4.46784	21.9647
-132.435	-47.0303	21.9761
-49.3076	82.0384	21.9792
-28.3227	-64.5249	21.9803
64.1526	-56.532	21.9853
-75.4263	65.9286	22.0036
-60.9631	-23.857	22.0052
169.383	-5.41703	22.0059
84.419	46.0401	22.0178
-147.193	-7.77133	22.0258
17.0454	-63.66	22.0273
66.5326	33.9689	22.0323
-176.045	42.4611	22.0328
131.703	71.6984	22.0332
36.0008	-65.5002	22.0417
-170.142	68.9548	22.0545
-147.329	34.9352	22.0695
66.9112	0.737263	22.0734
-45.718	-60.8199	22.0759
-131.842	-19.3724	22.0832
-122.772	15.7319	22.0865
155.314	34.2157	22.0936
-21.4568	-58.7694	22.0988
119.127	2.65068	22.1031
101.817	-13.6908	22.1076
68.2368	-64.8318	22.1078
-132.71	-5.37267	22.1098
100.181	-52.8653	22.1219
-13.7838	53.0506	22.1294
-65.2686	-39.9627	22.1408
145.415	55.9831	22.1472
171.708	35.8082	22.1486
-32.874	-22.6459	22.152
127.734	-13.9565	22.1547
-116.291	-40.1264	22.1554
-104.636	63.0925	22.1628
-129.727	-48.1899	22.164
-104.369	-26.5059	22.1674
-76.3975	65.3361	22.1756
78.9274	19.213	22.176
-131.149	15.6437	22.1767
-121.56	0.61092	22.1782
-126.229	-22.5331	22.181
144.286	60.1905	22.1816
-89.2428	-45.6976	22.1865
161.508	31.132	22.1903
-127.859	39.3581	22.1904
54.7042	14.5481	22.1983
99.3761	-3.82656	22.1984
-151.053	5.10706	22.214
176.004	-9.74337	22.2284
-178.561	22.0726	22.2288
165.093	-37.8954	22.246
-96.9269	18.6414	22.25
-70.9139	77.7753	22.2504
-62.8829	-54.0267	22.2578
-143.784	-12.1685	22.2618
61.255	22.3817	22.2681
-99.9252	35.4547	22.2772
161.401	-20.0341	22.2929
179.788	13.9501	22.2982
-63.9013	78.7896	22.3028
-86.5439	37.477	22.3129
57.5963	5.72865	22.3136
51.3964	11.1334	22.3143
68.5353	-55.904	22.3238
-89.0177	35.0282	22.329
-166.965	47.4858	22.3314
28.3784	-31.8232	22.3356
-35.8518	52.3397	22.3373
135.977	-8.42291	22.3377
13.2218	-25.9464	22.3545
78.0934	-58.402	22.379
63.6664	65.1956	22.3811
139.107	53.3359	22.3906
48.626	-86.3152	22.3907
89.7548	29.0231	22.391
157.762	-0.194689	22.3911
-35.2415	-53.6237	22.3913
-145.807	36.0686	22.3959
30.0473	2.14244	22.3971
61.2626	46.7801	22.3972
124.331	-40.9637	22.4051
142.973	68.5827	22.4123
44.2086	28.7054	22.413
98.9156	-8.43902	22.4142
16.3422	-47.4964	22.4192
-80.017	12.6424	22.4276
-62.5272	-13.9775	22.4287
76.5892	-40.4178	22.4301
-23.9762	-48.4581	22.4326
2.01631	-7.70279	22.438
-154.903	14.8006	22.4446
-128.852	33.7008	22.4448
-0.859804	-14.9874	22.4455
-78.6382	11.8977	22.4456
-120.565	-36.4863	22.4487
152.107	43.2038	22.4634
-152.508	-56.4525	22.4718
50.8477	-31.6893	22.482
-156.507	12.4718	22.4861
-68.1079	-10.9692	22.488
-154.176	-1.83595	22.4918
-107.031	31.0764	22.4957
-121.37	-0.0541633	22.4982
167.125	-21.5657	22.4994
173.113	66.4595	22.5026
167.343	-44.3197	22.5139
-142.614	-45.003	22.5219
46.4992	-30.3724	22.5237
-171.761	-46.2962	22.5244
-53.8916	84.3655	22.527
78.9366	0.0328556	22.5283
77.7782	-17.2954	22.53
-133.825	-84.4692	22.5307
158.261	33.7143	22.5398
178.577	65.855	22.5408
92.7009	-0.857562	22.5452
126.464	40.0736	22.5456
107.15	-50.0007	22.547
-136.032	45.2843	22.5514
-144.606	-37.6149	22.5541
-175.193	35.3234	22.5591
30.729	33.7906	22.5594
-117.141	-52.077	22.5598
113.655	5.40918	22.5612
65.5628	36.8746	22.5637
-130.947	-5.39053	22.5658
-130.664	-62.7079	22.5679
59.9135	-35.4201	22.5761
115.226	-15.9552	22.5824
177.801	37.1759	22.5956
149.588	60.2523	22.6013
-90.0315	26.5703	22.6015
-83.5508	11.8743	22.6018
101.787	-20.8504	22.6019
-71.5968	-49.8306	22.6075
120.472	-37.6601	22.6079
-97.2908	20.7607	22.61
61.1898	70.5671	22.6102
-140.751	-3.65742	22.6114
127.983	30.0164	22.6117
-133.979	-33.5153	22.6126
-128.794	-49.2358	22.6128
-73.7763	27.1128	22.6133
132.2	-16.2001	22.6146
-173.6	6.10003	22.6146
-168.8	6.20003	22.6146
-172.3	7.90003	22.6146
-96.8666	25.4001	22.6146
-171.7	33.8002	22.6146
-144.152	-9.77186	22.6155
168.576	-52.5463	22.6156
-43.9438	-36.9383	22.6245
70.3293	-38.9344	22.6259
-107.479	-55.3549	22.6276
-140.803	-40.3094	22.6298
-154.241	29.5451	22.632
-86.3469	-41.18	22.6361
10.1185	-32.6169	22.6378
-143.475	-24.2345	22.638
-178.891	52.8344	22.6439
113.678	-20.5349	22.6507
-105.749	-60.0945	22.651
28.7305	-36.258	22.6603
49.7813	80.0962	22.6613
-124.057	38.0974	22.6617
-160.158	18.7877	22.6618
-59.3328	-61.4122	22.6626
-45.4113	47.0341	22.6634
171.182	8.38219	22.667
-102.544	77.2443	22.6684
176.311	28.689	22.6901
125.79	17.0601	22.692
-21.9642	-23.424	22.7041
-105.581	61.8582	22.7046
-25.1237	-46.1018	22.7057
176.286	36.3607	22.7242
-102.304	2.7404	22.7252
94.7203	-54.3151	22.7263
137.498	6.95848	22.727
27.613	65.1931	22.7277
-31.4929	-49.7605	22.731
9.04051	63.8225	22.7444
93.5551	-32.0695	22.7578
-21.4033	-83.8116	22.7743
120.539	-0.831228	22.7748
55.4496	64.549	22.7801
159.333	-48.2919	22.7842
-83.8337	51.075	22.7907
-139.345	38.4434	22.8041
-157.223	14.3709	22.805
-142.347	12.7399	22.822
-101.673	37.9201	22.8311
-155.566	-78.4467	22.8422
160.168	-23.0033	22.8427
111.62	-8.32133	22.8456
77.8125	-36.3509	22.8546
-54.2621	-25.443	22.8564
-0.246474	-13.2255	22.8601
110.459	2.00283	22.8653
31.836	-44.5535	22.8666
28.8323	-44.113	22.8679
-110.661	4.5269	22.8682
106.731	-12.4429	22.8694
69.4231	-50.5964	22.8756
-68.3701	-58.3906	22.8949
-118.686	-56.6786	22.9037
131.965	0.555306	22.9088
102.31	-19.0165	22.9095
37.3259	32.7807	22.9125
8.46247	-11.1111	22.9125
107.753	-15.8508	22.9184
17.0431	59.2471	22.9218
100.741	-53.2037	22.9237
-57.4085	-60.4789	22.9237
176.534	50.6541	22.9245
142.037	-43.925	22.9279
-3.1245	-60.0367	22.9331
65.3983	-40.8757	22.9385
80.7185	18.2272	22.9497
2.81679	76.3398	22.9625
-95.9159	19.7242	22.9631
-115.058	56.8402	22.9643
76.7147	52.2996	22.9662
131.259	-39.2368	22.9724
-170.792	30.7826	22.9947
-165.885	50.5272	23.0043
35.731	-1.65777	23.0089
117.641	-35.2274	23.0151
125.759	53.4502	23.0193
65.4534	-12.1677	23.0196
56.6569	77.6752	23.022
0.445939	-63.8204	23.0471
154.637	-17.0499	23.0508
-12.5734	-46.0946	23.0666
178.238	-50.9699	23.0683
70.031	-65.2343	23.0802
-0.0148515	-22.482	23.085
166.704	38.9587	23.0925
160.143	-62.5498	23.0979
-39.8632	41.7298	23.1049
-25.4581	-36.8393	23.1117
-153.801	-63.3826	23.1131
156.654	-60.4038	23.12
111.619	7.4884	23.1276
62.2668	-40.5087	23.1296
115.921	19.3038	23.144
51.0493	32.1456	23.1454
34.9512	-64.8637	23.1557
-119.485	10.5345	23.1572
-16.713	-63.2304	23.1638
-71.1202	-60.6726	23.1681
-96.105	76.7438	23.1693
84.1079	-66.3426	23.1695
-141.675	-17.6969	23.1742
172.9	-6.6594	23.1758
-149.825	67.9434	23.1882
-45.6686	29.0105	23.1938
118.868	17.1995	23.2058
-114.929	-37.178	23.2163
84.1367	20.5022	23.2214
-130.761	-50.8892	23.2333
83.8167	-76.5263	23.2374
66.4596	-32.6102	23.2416
21.0379	-42.4981	23.2475
31.5357	-63.1315	23.2495
113.025	-88.2341	23.2607
108.157	4.52036	23.2633
-39.9256	50.473	23.2677
-145.956	-1.95506	23.2693
-148.97	-26.7746	23.2764
17.6247	-65.8105	23.2876
171.086	-52.7679	23.2973
33.4038	26.1246	23.3018
-109.868	71.0349	23.3075
69.3999	43.0864	23.3141
111.395	-0.735425	23.3325
-124.161	-47.4565	23.3344
121.958	-27.1116	23.3411
75.1184	81.4916	23.3454
106.642	31.2574	23.3476
98.1762	33.4867	23.3478
38.8138	30.2938	23.3532
78.0559	-59.7214	23.3585
-113.779	-39.7739	23.3641
-104.448	17.1823	23.3648
-148.135	-25.4213	23.37
-133.538	25.8275	23.3713
-166.423	-23.7017	23.3717
33.4035	18.3692	23.3748
-40.2744	-36.0611	23.3813
-167.896	-25.1425	23.383
50.6569	-13.5267	23.3887
48.0941	-65.115	23.3894
23.1869	-58.5086	23.3906
-175.221	78.4073	23.3922
40.2532	16.5761	23.3934
-73.448	56.8279	23.4073
83.3627	-70.5959	23.408
6.94071	-18.7144	23.4086
-153.068	4.17963	23.4114
-166.723	-7.09986	23.4154
-126.819	19.2287	23.416
138.569	85.9086	23.4211
141.681	-66.4328	23.4241
-116.404	9.16991	23.4244
-24.7083	-24.2112	23.4257
126.703	-30.9921	23.4263
27.5886	-47.8078	23.4264
-66.0545	84.0332	23.4271
92.1112	26.1412	23.4282
-22.9702	-54.3352	23.432
160.909	-48.7012	23.4363
169.211	1.19232	23.4392
-179.868	-4.11314	23.453
-127.869	47.9942	23.4551
99.14	-20.7814	23.4566
-18.8546	-40.0514	23.4577
-113.814	29.2626	23.4594
57.9867	-38.9722	23.4738
-178.685	42.2667	23.4783
-157.268	-16.9851	23.4805
-122.589	42.6773	23.4882
71.8539	-81.5081	23.4918
-95.6401	48.1872	23.4967
114.037	16.7849	23.5033
-105.992	57.5479	23.5052
76.2569	41.2072	23.5057
38.5892	-2.72996	23.5084
-40.2383	-42.5845	23.5144
-106.015	19.4882	23.5185
2.16477	-53.6318	23.5239
8.32014	-35.011	23.5375
101.765	-16.8452	23.5414
157.25	-34.1465	23.5558
47.4629	-72.8382	23.5588
-69.3024	-2.93585	23.5617
-7.94023	-15.4596	23.5748
-126.741	17.26	23.5755
-145.338	65.0924	23.5814
65.1858	-40.2354	23.5816
-7.04847	-4.69875	23.5936
-163.63	-42.3962	23.5941
146.553	-44.2067	23.5952
167.823	4.04153	23.6088
156.042	-44.4998	23.6093
44.585	24.6859	23.615
-119.622	-22.5135	23.6196
76.8631	20.5647	23.6228
103.493	31.9508	23.6231
124.599	-32.5066	23.6255
-120.103	-41.9062	23.63
-149.83	-73.5796	23.6305
73.8642	39.3323	23.6441
-134.688	-37.7305	23.6447
-39.1925	-27.8322	23.646
-124.191	-7.80603	23.6466
-71.8653	4.95087	23.6487
-78.289	6.80003	23.6495
-178.6	24.9001	23.6495
-98.9373	-2.23147	23.6496
123.447	14.2473	23.6514
-178.599	-8.21548	23.6521
144.789	-19.3359	23.6542
-93.9135	-33.6826	23.6563
-150.909	-34.161	23.6571
-132.593	83.3122	23.6572
-174.958	37.3157	23.6629
74.3283	-16.7622	23.6633
24.0906	-73.4274	23.6694
-141.282	34.9488	23.6715
-64.5294	53.2708	23.675
-118.109	-34.6441	23.6759
-138.685	-36.5185	23.6774
56.8153	9.35337	23.6843
-170.272	-19.0759	23.6922
-133.606	76.3062	23.6945
-169.373	53.5172	23.7009
97.7301	9.25711	23.7069
-179.042	29.7928	23.7102
156.908	-58.7996	23.7124
-79.1323	19.6016	23.7139
139.105	55.0656	23.717
-149.71	50.3044	23.7236
138.789	-14.8347	23.7301
76.533	-16.1313	23.7338
-96.8757	56.3127	23.7393
-175.816	63.188	23.7516
150.705	57.4308	23.7616
112.955	35.1821	23.7762
59.9941	-0.961953	23.7869
36.5145	-67.1273	23.7871
21.5838	-70.0046	23.7914
-122	75.8442	23.8
82.3259	83.2019	23.8001
-126.222	-3.9567	23.8117
59.3514	42.1227	23.8209
-69.6303	-59.9609	23.8316
179.606	19.5579	23.8318
-91.3651	40.2165	23.834
43.5706	73.2192	23.8351
-124.719	26.7948	23.8388
116.022	-14.4984	23.8428
135.39	-33.0063	23.8452
106.351	25.7774	23.8473
-101.793	3.2934	23.8536
-29.504	-41.7072	23.8619
149.576	47.771	23.8651
-48.7671	-14.5195	23.8659
141.42	50.723	23.8672
64.2863	9.3221	23.8712
107.763	52.5237	23.8714
40.7016	-29.942	23.8847
78.9798	5.31543	23.8865
140.229	16.6164	23.8919
137.416	4.76976	23.8968
159.1	-44.7628	23.8992
-123.602	25.8999	23.8995
-130.381	-16.5653	23.9014
122.06	-22.7907	23.908
-71.6678	43.5604	23.9149
174.224	-32.277	23.9271
-58.8087	23.3751	23.9287
97.9861	19.0539	23.931
157.514	61.0966	23.9424
22.7202	-71.856	23.9449
142.459	28.6161	23.9486
-172.908	7.88949	23.9491
-97.9706	-14.7495	23.9519
96.0246	-31.8854	23.9637
-98.8383	44.8376	23.9662
53.7362	57.884	23.9735
123.449	30.8811	23.9855
-177.061	36.0655	23.9914
45.5348	65.0181	23.9925
42.2713	-24.2947	23.9982
1.76111	-16.9808	24.0012
92.5892	84.9841	24.003
163.969	21.3055	24.0108
76.8551	-7.9807	24.0199
-40.4933	59.2587	24.0264
33.3293	-45.6676	24.0474
50.3656	12.1694	24.0507
-82.4097	31.5127	24.0563
68.1031	85.5522	24.06
-0.797603	-21.6684	24.0724
112.766	-23.3978	24.0758
-153.871	12.0659	24.0783
-161.356	40.5063	24.0809
30.39	-47.7983	24.0839
-142.479	35.295	24.0844
81.8877	31.3438	24.0945
6.02585	36.9921	24.0985
63.5437	79.3653	24.1005
-102.609	66.7575	24.1047
114.622	-49.5789	24.1162
-119.133	47.0578	24.1195
78.9112	-19.0457	24.1203
127.206	-36.6093	24.1362
174.134	-71.8606	24.1378
-104.41	-62.4295	24.1514
162.494	-19.4134	24.1555
125.566	-12.7851	24.1578
-166.705	70.0703	24.1605
140.538	30.7728	24.1644
91.681	-2.38006	24.1717
-107.442	33.7802	24.1804
140.49	24.2745	24.1806
147.249	-18.6493	24.1869
-120.786	-51.2401	24.1912
127.056	-11.4876	24.1931
43.0869	57.2004	24.194
-161.605	12.4663	24.1944
-48.0389	-49.5269	24.1945
124.496	34.6598	24.2006
107.825	-61.4575	24.2114
160.216	-3.52586	24.2502
81.4426	-64.0192	24.2509
175.356	-9.26083	24.2552
108.853	12.7329	24.2575
50.0026	-35.3443	24.2827
5.8309	-15.1375	24.2853
-94.8027	12.3076	24.294
107.549	-87.1424	24.2973
116.92	35.2159	24.3
23.5258	-22.1061	24.3052
-74.1874	-49.5351	24.3053
82.8999	-9.59264	24.3082
-117.939	-5.40358	24.3146
-57.7178	-54.7531	24.3155
179.781	39.1481	24.3214
61.7024	-46.7945	24.3331
105.241	-32.8689	24.3392
13.7543	67.1584	24.3491
168.104	23.8662	24.3587
-119.77	41.9163	24.3593
-85.6313	9.75841	24.3698
11.615	-58.6257	24.3699
-0.276924	16.8744	24.3727
-110.204	3.90931	24.3731
69.1284	-44.366	24.3798
155.688	23.07	24.3882
161.596	3.30162	24.3925
36.4286	-70.7463	24.394
128.787	-45.7603	24.3963
-91.9217	-38.6018	24.3971
152.802	-24.0035	24.4158
-131.899	33.3239	24.4174
127.258	-12.4491	24.4211
30.4725	49.7587	24.4234
-23.1227	40.4385	24.4248
77.8894	-16.8937	24.425
169.199	-23.3614	24.4399
88.4465	-16.5988	24.4468
153.779	29.1695	24.4522
-124.374	-74.0552	24.4559
-127.354	55.8551	24.4643
15.4029	-30.0678	24.4675
4.15779	-56.6309	24.4703
-88.1624	45.5716	24.4748
-46.0825	59.0847	24.4758
144.991	-62.4348	24.4954
77.2499	-4.46403	24.4982
13.86	13.0545	24.4998
-174.861	-55.4056	24.506
142.473	31.5149	24.5076
15.282	-74.7369	24.5084
12.8176	-61.5804	24.5085
-131.934	8.79933	24.5276
-40.913	58.8208	24.5298
-179.907	-2.12397	24.5321
-122.091	-46.6647	24.5322
89.6239	-5.50525	24.5477
157.136	11.5424	24.5485
-97.0641	14.0204	24.5506
-112.474	-63.2855	24.5551
50.1781	-15.3032	24.5557
-0.33266	-63.512	24.5641
-76.4682	11.5694	24.5662
-116.408	-20.5364	24.5862
31.8372	-27.9056	24.5914
0.207297	-52.0339	24.5932
-97.021	32.3026	24.5971
98.4304	-21.1977	24.5974
-97.7074	12.2683	24.6096
72.8889	32.2089	24.6101
-125.709	-28.3625	24.6146
1.56562	-40.4124	24.6158
162.139	12.0367	24.6181
-170.621	40.1529	24.6185
-156.117	-38.468	24.6335
-167.6	-64.0993	24.6355
155.848	-35.6924	24.6418
62.9367	35.3327	24.6433
0.79272	-13.3188	24.6471
-49.6436	-66.5963	24.6491
31.1394	35.4364	24.6504
-137.836	71.1588	24.6566
-122.737	-47.7755	24.6656
96.8113	71.5594	24.6668
119.91	56.6141	24.6669
-142.221	-49.9427	24.6683
-125.575	-19.8212	24.6697
-145.481	-18.6269	24.6699
-70.9127	28.1637	24.6718
-145.752	-22.6565	24.674
64.0188	-0.601075	24.6755
-79.7908	-41.7003	24.6791
-176.1	20.2001	24.6791
-98.0394	44.77	24.6855
-122.027	7.25778	24.6858
52.9934	49.7001	24.6899
-57.131	70.6185	24.6932
176.421	40.0721	24.6976
-153.455	30.1311	24.7003
98.1252	0.492734	24.7021
-167.521	22.2901	24.7067
130.504	-5.30702	24.7169
-137.569	29.7822	24.7186
49.6863	50.3898	24.721
101.088	-37.1711	24.7315
-67.0053	-65.3151	24.7538
7.25103	35.2909	24.7545
95.2359	-11.1974	24.756
-21.9975	-37.3763	24.7667
-81.0202	-49.1368	24.7678
3.58294	4.16875	24.77
-136.976	-62.0735	24.772
115.687	17.0953	24.7738
66.9582	10.6921	24.7803
-157.227	50.9917	24.7888
69.8413	-30.5425	24.7897
-112.868	39.347	24.7939
-67.4616	-12.5648	24.7971
102.899	-25.1058	24.8084
-146.952	59.52	24.8198
151.728	-64.3443	24.8227
-65.0827	-29.879	24.8228
-105.672	69.4434	24.8284
39.7034	-48.8035	24.8607
-177	60.8214	24.8664
39.7544	-1.64198	24.8666
24.3143	-20.376	24.8667
161.676	54.0794	24.8671
-130.584	-42.5333	24.8821
165.283	-21.5553	24.8828
71.0701	-37.0161	24.8886
-172.88	54.5035	24.8907
15.4933	82.944	24.9038
38.0149	-55.0307	24.9087
49.7877	-14.7695	24.9093
-120.601	76.6998	24.9143
64.6876	-12.3315	24.9177
-25.3997	-65.1981	24.9222
-66.0579	-73.23	24.9348
-66.7665	-13.6278	24.9461
177.573	-58.4213	24.952
174.593	-9.87308	24.9563
-154.08	31.2086	24.9634
-97.4439	53.5454	24.9646
19.0176	-21.211	24.9661
-14.5957	-34.9135	24.9762
129.159	32.9234	24.9772
7.2764	2.89338	24.98
167.798	-59.7592	24.9897
130.891	9.17147	24.99
21.4364	6.13841	24.9957
141.444	-68.0539	24.9968
133.284	-25.0477	24.9989
-150.67	0.353613	25.0005
-174.682	75.0942	25.0079
-151.142	46.9306	25.0132
108.149	-42.8499	25.0165
79.0041	22.5774	25.0236
-118.88	9.56919	25.0283
138.646	-34.5383	25.0334
-96.66	59.306	25.0383
48.6544	-34.9244	25.0401
-164.978	-3.30134	25.0517
177.076	-13.1336	25.0584
6.14825	-59.5856	25.0684
74.9519	19.6646	25.0752
146.058	-64.518	25.0908
-102.908	-59.5644	25.115
39.6614	59.6485	25.1429
8.14273	-1.23656	25.1473
-135.006	-28.8858	25.1587
95.3537	-4.23568	25.1598
-162.631	40.1322	25.1604
87.6431	-7.63841	25.165
179.346	23.6215	25.1699
48.7301	15.2622	25.1735
132.797	40.8212	25.1779
71.3607	-44.4642	25.1807
-17.7974	-46.8059	25.1909
17.2927	-37.4429	25.2127
124.445	-0.987073	25.2146
-92.0773	39.1905	25.2159
124.817	29.8125	25.2207
-116.818	20.4773	25.2301
-86.0933	32.7202	25.2391
63.0774	-72.3465	25.2445
-178.504	59.0359	25.2505
-34.6867	29.957	25.2511
153.445	63.7941	25.2529
19.649	-56.1849	25.2681
-159.238	55.6817	25.2827
-24.5931	-56.0805	25.2834
156.689	10.4735	25.2835
158.402	-59.1904	25.2839
172.677	71.0848	25.2846
-79.7285	39.7942	25.2858
-118.533	21.6821	25.2949
-136.336	-10.7024	25.2987
18.4611	-60.6194	25.3016
-119.573	37.8157	25.3024
176.02	70.999	25.3053
-174.133	-12.3416	25.3125
-96.9959	35.9096	25.3209
117.449	48.9552	25.3272
-131.911	-4.57506	25.334
-62.8061	-16.0203	25.3379
15.2553	-18.3775	25.345
-72.4228	-16.6121	25.3499
-12.0868	-39.9261	25.3543
115.221	11.2805	25.3572
-177.786	-12.3359	25.3631
12.4866	-46.4681	25.3696
173.798	54.9413	25.3828
109.716	31.1495	25.3855
-128.046	-28.8128	25.3908
-119.997	-28.5118	25.3949
45.744	-67.8718	25.399
134.647	-47.2879	25.4121
-155.672	46.1	25.4124
-23.5513	-35.5061	25.4183
-127.099	-60.3323	25.4189
37.9935	25.3073	25.4266
147.672	-41.7036	25.4299
107.091	-74.2123	25.4304
179.056	54.4927	25.434
-141.263	54.431	25.4347
-1.76365	-4.29319	25.4384
119.615	51.8447	25.443
-154.665	-1.03257	25.4458
63.4135	-48.3144	25.4533
178.877	0.500579	25.4611
-62.1109	-73.1437	25.4649
-21.6171	-22.2123	25.467
-2.85499	-23.9978	25.4676
62.0345	47.5289	25.4679
-155.468	20.1469	25.4686
-38.1692	-36.5362	25.4689
-2.1876	-54.1849	25.4724
-152.873	25.1373	25.4734
65.5087	-3.43239	25.4736
139.506	33.0408	25.4789
167.936	-82.3578	25.481
-127.734	35.1191	25.4927
36.6396	-9.63965	25.4955
61.4071	53.8378	25.5011
73.349	49.7432	25.5014
-118.522	31.4024	25.5086
-77.1072	-55.3789	25.5162
164.318	-47.9342	25.5174
-63.7031	-28.025	25.5193
121.28	43.1068	25.5205
147.009	68.0674	25.5229
113.534	0.53764	25.5362
-136.483	-5.28795	25.5445
171.84	-50.9732	25.5449
94.0135	49.163	25.5484
-169.145	41.0799	25.5526
155.832	-40.1818	25.5657
-171.952	42.2248	25.58
87.5729	-17.3017	25.5985
-107.577	39.7523	25.6019
176.899	-59.7806	25.6049
21.7612	11.6539	25.6113
31.1532	-27.7049	25.6219
43.2848	29.1606	25.625
-29.2067	23.2703	25.6297
85.31	-80.6989	25.64
-175.814	-40.7271	25.6418
132.189	19.8729	25.6443
-122.327	-33.5214	25.6483
104.263	-24.9959	25.6492
-29.1623	-54.8929	25.6516
76.708	-53.6198	25.6522
-122.1	-22.391	25.6578
122.986	-36.4	25.6652
-40.6	-14.7001	25.6662
-174.2	9.60006	25.6662
-121.5	29.7002	25.6662
-151.796	-0.475852	25.667
141.16	-12.6519	25.6686
-80.6514	-42.7852	25.6693
139.957	-15.3878	25.6732
-119.447	26.1361	25.6768
-123.275	19.9487	25.6786
-170.745	28.9874	25.6802
-128.803	-42.2095	25.6847
-84.3559	21.41	25.6877
-167.701	37.4734	25.688
-154.351	14.1786	25.6963
94.5476	-53.1247	25.7005
-133.948	-49.049	25.7054
-163.368	25.8337	25.7063
-108.109	44.3884	25.7129
57.4824	64.7741	25.715
-136.103	-43.5904	25.7155
-15.2486	0.92712	25.7223
73.2612	-39.9144	25.7244
145.831	3.3487	25.7249
-166.006	23.68	25.7281
122.069	-2.09175	25.7333
-132.616	-62.256	25.7335
127.043	42.036	25.7416
-132.594	52.543	25.7419
85.7465	31.433	25.7477
-138.297	-71.3647	25.7572
158.435	-17.9856	25.7592
-119.827	-2.65626	25.7604
-21.9531	-66.6332	25.7642
-152.256	53.2763	25.7643
103.578	-46.5044	25.771
158.681	25.3681	25.7807
-92.8628	55.0881	25.7816
6.90557	-51.8811	25.7821
162.095	65.3081	25.7848
-55.4905	-72.5685	25.7931
142.57	17.6424	25.8044
148.823	66.2869	25.8367
179.405	35.7935	25.8419
-150.705	-65.9484	25.8451
-179.027	0.515109	25.8461
-63.0312	-22.4115	25.8666
89.5399	-26.1123	25.8692
163.554	36.8755	25.8697
-140.45	28.1189	25.8709
144.123	61.8626	25.8766
152.937	48.6546	25.8811
140.96	-9.03233	25.8828
172.02	-20.033	25.8854
81.7706	-58.7357	25.8889
-135.805	38.0386	25.891
-70.4613	62.7262	25.8942
-51.3118	-63.5332	25.8954
-14.1928	-45.562	25.8961
-169.924	19.6316	25.8981
30.8004	-21.8553	25.9068
-138.81	48.1104	25.9135
114.11	41.7074	25.9279
-65.5537	-12.9178	25.9346
0.445633	-61.5152	25.9357
70.8674	-35.1082	25.9537
-145.829	28.7909	25.9552
-153.084	-71.2641	25.9601
143.825	18.5768	25.9784
96.1178	-13.8435	25.9799
29.6411	-43.2044	25.9805
138.465	-4.19569	25.9835
160.554	27.1971	25.9924
82.867	44.8988	26.0063
65.6634	-63.9121	26.0174
173.32	-63.5365	26.0206
-173.905	-18.824	26.0212
112.73	31.8886	26.0295
11.0814	-9.80661	26.0426
46.8633	-67.4329	26.0455
167.244	10.378	26.0508
116.21	7.50299	26.0524
-31.6164	-55.4943	26.0572
135.323	-61.9351	26.0581
153.522	11.4133	26.0601
56.8606	4.84275	26.0644
-14.5596	-8.9078	26.0733
61.0571	53.3375	26.0749
-164.576	-44.4677	26.0881
174.863	-10.3818	26.091
-126.647	50.4103	26.0953
85.9126	-17.2362	26.0967
-163.309	-12.6458	26.1037
-99.7506	-80.9546	26.1044
-163.699	-51.7075	26.1086
-127.249	-55.5534	26.1089
134.368	-52.3145	26.1288
13.5305	-37.5391	26.1362
119.294	52.9962	26.1462
-179.267	-9.70674	26.1504
-172.804	35.587	26.1566
165.986	-24.4276	26.1822
-82.3491	41.91	26.1863
72.0821	42.4175	26.187
86.2496	-71.3623	26.2028
-149.735	-36.3399	26.2107
49.5801	23.2499	26.2154
-95.7276	11.7674	26.221
113.619	38.1026	26.2248
3.32625	-60.1449	26.2347
135.809	25.8733	26.2376
-20.8074	13.8914	26.241
98.7627	-11.3146	26.2419
173.353	-56.2406	26.2495
-139.921	-20.1937	26.2511
89.5487	49.5755	26.2553
34.0189	-0.014525	26.2592
62.5545	54.6553	26.2621
32.6978	-73.9024	26.2669
30.5792	-72.4371	26.2737
123.282	4.8675	26.2801
-31.9196	-32.9378	26.282
-100.838	19.8536	26.2834
16.483	-29.7157	26.284
122.349	-24.4846	26.2867
119.276	-4.91268	26.2953
-178.245	-5.77944	26.3046
69.2942	-34.7086	26.3058
154.164	-35.8653	26.3089
157.362	-39.1364	26.3161
-5.88196	-0.654071	26.3359
86.7045	-53.4387	26.3366
-123.078	62.2887	26.3539
150.34	-36.022	26.3582
-103.341	-58.0198	26.3614
121.381	32.3106	26.3739
59.7428	46.8389	26.3753
122.379	80.8186	26.3787
-167.902	-27.4961	26.3803
-8.74917	20.2662	26.3916
-129.061	-28.9701	26.3962
-162.781	39.119	26.4045
90.0785	-15.7529	26.4183
95.9474	-21.1352	26.4229
-77.1926	29.3799	26.4345
4.70074	-19.2809	26.4387
159.758	-59.5529	26.442
-155.286	21.2594	26.4444
-104.496	47.008	26.4604
121.493	63.2592	26.466
154.946	-53.409	26.4674
7.96824	-43.371	26.4704
-79.2641	45.9025	26.4848
-126.935	-16.66	26.4872
-140.168	38.8538	26.493
-4.56727	-10.2036	26.4937
53.4209	64.2092	26.5055
-76.2436	75.6652	26.5158
43.9425	-29.438	26.5277
85.4734	-40.28	26.5288
153.751	-50.8446	26.5312
-45.3077	-71.9351	26.54
101.775	67.3302	26.5424
-38.9434	84.6243	26.5463
-157.196	-32.3324	26.556
-176.839	-56.0811	26.5624
170.323	-44.0393	26.5673
122.581	15.1524	26.571
-123.239	68.6011	26.5875
103.135	-47.6927	26.5881
84.7368	-11.7408	26.5915
105.592	11.1562	26.5918
-48.3841	-39.6059	26.5968
7.28149	-7.91124	26.6025
143.301	67.7077	26.6134
-155.874	29.6361	26.614
-145.727	-59.5416	26.6373
-176.139	-44.0844	26.6411
119.056	33.6349	26.6412
172.445	-67.386	26.6487
101.091	19.3989	26.6587
31.4073	21.5034	26.6613
-149.518	15.042	26.6689
22.0615	-60.6074	26.6738
38.662	36.9596	26.6898
-128.478	-0.69684	26.6924
2.8	-23.5002	26.6929
-178.4	-10.5001	26.6929
-176.4	12.7001	26.6929
138	38.0003	26.6929
-135.767	-15.985	26.6939
-83.1211	15.685	26.6939
140.86	-11.3519	26.6952
-127.503	-30.2699	26.697
-119.421	5.51834	26.6971
-178.856	8.75912	26.698
147.328	-14.0717	26.7004
-85.7314	-45.6192	26.7035
-153.728	31.5875	26.7091
-155.385	27.1747	26.72
-153.183	23.7183	26.722
129.109	-49.5656	26.724
21.4964	-27.8835	26.726
99.6647	18.7625	26.7283
61.5409	-39.5618	26.7295
-77.6236	34.8215	26.7363
-156.382	26.9379	26.7388
-170.337	46.3618	26.7511
99.9815	22.6474	26.7577
-153.409	57.3033	26.7649
176.141	37.1567	26.7793
53.787	36.5427	26.7994
46.8712	67.6411	26.8014
-177.405	-12.865	26.8046
38.3968	-56.1728	26.8048
-7.33803	-9.35944	26.8187
141.241	-0.969726	26.8197
37.193	-22.5671	26.821
-2.50883	-56.3762	26.8218
47.4172	-85.5511	26.822
118.001	16.7077	26.8249
149.384	-25.5024	26.8251
141.54	53.2663	26.8385
177.224	41.0423	26.842
-54.4211	-61.8063	26.8483
46.8437	16.0548	26.8511
50.1947	-68.8136	26.8526
165.727	21.0366	26.8566
86.1247	35.3097	26.8653
158.634	49.0379	26.8662
-122.164	-30.3714	26.8719
-24.5267	-36.5281	26.8756
-115.397	-41.9701	26.8756
-12.2949	-48.3696	26.9046
-178.418	51.4893	26.9127
10.8623	-34.4086	26.9146
21.4216	-44.9753	26.9189
-68.5018	10.8155	26.9208
151.221	75.1819	26.9235
53.3853	67.3029	26.9299
-78.3732	47.0908	26.9302
-87.4706	-45.669	26.9329
-25.3028	-56.8297	26.9479
-115.209	45.6285	26.9655
-129.944	40.7457	26.967
-130.018	3.68044	26.9684
100.036	-59.633	26.9709
-159.063	-63.1913	26.9787
-178.535	63.205	26.9794
91.5888	-12.3946	27.0096
-21.6734	4.28824	27.0115
154.237	-16.3202	27.0151
20.6443	-60.6532	27.0215
121.196	13.5093	27.023
-128.195	-21.317	27.027
11.1263	-24.4189	27.0348
31.3538	-38.2416	27.047
3.70905	-47.4563	27.0486
-93.6822	64.5203	27.0502
85.8443	-36.2868	27.0558
55.7343	83.5062	27.0581
3.82656	70.5733	27.0753
-49.0506	-64.8777	27.0811
16.2557	-53.0023	27.0854
106.091	-7.20692	27.0862
-121.733	51.2537	27.0965
50.9528	68.125	27.1025
177.023	17.2875	27.1065
177.857	17.855	27.109
100.696	35.7857	27.1127
110.989	-43.6605	27.1158
8.44554	-17.6828	27.1312
-112.244	34.102	27.1503
36.5559	-43.4436	27.1531
-112.965	-11.632	27.1533
86.4389	-37.6988	27.1596
-51.4862	-32.2165	27.1605
102.39	-12.3725	27.1677
-122.177	46.4225	27.1724
122.689	49.2517	27.1938
63.8327	-34.8452	27.2066
72.451	2.07657	27.2091
109.973	40.198	27.2103
12.1876	-32.411	27.2227
-124.841	-4.75437	27.2235
145.929	-5.24337	27.2272
101.918	-30.3373	27.2614
-5.7495	-25.5047	27.2718
15.9528	16.2755	27.2734
75.2543	19.672	27.2828
-131.769	13.5025	27.2894
-82.9193	12.7018	27.2962
-122.752	26.5866	27.3031
170.387	-6.57467	27.3064
42.6317	31.3267	27.3091
145.019	39.3079	27.3193
140.34	54.6435	27.3257
72.9905	-65.322	27.3335
-164.051	55.0584	27.3415
168.191	21.2266	27.3494
83.2233	-39.583	27.3811
0.790285	-51.5055	27.3895
53.4848	-54.2636	27.3969
32.9808	40.3037	27.4038
51.4891	-65.3298	27.407
96.4779	48.9233	27.4186
85.4667	41.3558	27.4447
-147.555	25.5695	27.4468
-162.693	16.8454	27.4529
134.679	36.2407	27.4654
156.383	-56.8456	27.4667
-122.019	40.6449	27.4699
81.4193	-16.3626	27.4716
-148.143	26.2899	27.4774
-167.634	40.0898	27.481
17.7833	-21.6898	27.4842
134.146	9.61465	27.4846
-144.298	34.5492	27.4892
48.5358	23.7378	27.494
164.663	34.8691	27.4971
18.3063	-58.868	27.4973
-62.7908	-3.89873	27.4996
-177.598	-16.5754	27.5173
173.508	17.0107	27.5271
30.013	-42.5291	27.5353
109.17	3.97729	27.5389
179.38	26.9405	27.541
17.6908	-63.952	27.5553
-136.143	22.4054	27.577
124.504	45.4175	27.5892
-7.56665	0.144556	27.6015
169.599	-49.2715	27.607
-172.154	-14.0444	27.6179
-167.43	-49.6387	27.6204
-150.649	55.9411	27.6522
107.36	-23.9112	27.6562
170.8	-46.009	27.6639
47.7727	54.8209	27.6683
67.0105	-34.4923	27.6685
-151.432	-37.6258	27.6741
-104.883	-20.9119	27.6822
60.577	58.3711	27.6854
45.7545	33.6685	27.6962
99.354	23.4457	27.7066
168.937	32.8221	27.7139
67.8	40.5003	27.7159
-159.423	0.571817	27.716
136.273	-52.7494	27.717
-111.541	-70.6212	27.718
-159.652	4.2591	27.7185
-168.769	13.2873	27.7224
160.829	84.1545	27.7653
151.059	-26.3216	27.767
-4.3717	-1.42977	27.7762
-124.946	-51.6568	27.7799
144.035	45.7795	27.7843
-136.603	-59.6341	27.785
112.207	-57.7217	27.7864
-166.765	24.5237	27.7918
-121.242	36.2763	27.7919
114.294	22.973	27.793
115.616	-52.8278	27.8035
118.352	-56.86	27.8056
-110.936	77.3582	27.8106
-158.595	45.9917	27.8192
59.9715	-65.8016	27.8207
11.1295	73.085	27.8243
49.5614	56.7942	27.8359
134.556	-2.17475	27.8359
-16.668	-22.7111	27.8414
130.846	15.1842	27.8495
62.0303	43.9552	27.8504
-145.465	-2.21945	27.8505
124.287	-3.12332	27.857
-175.021	1.21008	27.8613
-164.153	47.3625	27.8683
-179.187	47.4066	27.8699
59.8936	57.6795	27.8749
78.6246	-33.8495	27.8757
171.134	-5.62608	27.8794
-58.6276	-30.7596	27.8802
-149.99	76.6373	27.8814
53.4442	-52.9235	27.8877
149.384	-14.4886	27.8961
-121.945	29.3066	27.8969
16.4503	-68.6577	27.9064
93.0951	-13.8357	27.9096
101.026	9.38551	27.9125
30.6756	-27.3806	27.9183
93.053	-10.056	27.9187
163.533	-18.0796	27.9282
61.8455	29.1736	27.9289
67.7318	-48.0767	27.9327
34.1589	-3.09802	27.934
47.5628	-61.8831	27.9371
34.6204	-70.7912	27.9382
16.1247	-31.4527	27.9454
174.797	6.22714	27.9563
-32.4901	-51.7723	27.9603
144.385	59.3196	27.9711
-70.1439	61.8076	27.9868
-32.909	-75.9121	27.9909
174.848	-4.15206	28.0229
113.921	31.8644	28.0241
97.573	-15.89	28.0263
-28.8632	-55.7411	28.0282
-25.3461	-44.581	28.0433
-25.5902	-52.3482	28.046
39.1855	28.4505	28.0557
76.7756	21.7545	28.0626
-130.041	-59.865	28.0707
148.19	-1.62158	28.0711
154.613	-38.3665	28.0802
67.1488	65.2559	28.0844
127.502	43.8975	28.0871
65.99	-46.916	28.1057
14.5943	2.24266	28.1267
-21.7297	50.3211	28.1391
-12.5472	-58.8144	28.1397
-98.2691	24.3811	28.1434
-70.1964	-60.1397	28.1453
166.049	-19.9038	28.1523
13.7604	-66.1948	28.1627
144.367	31.6878	28.1757
75.8299	-59.411	28.1775
56.9619	-35.6633	28.1844
-168.249	-11.8564	28.195
128.595	16.2939	28.1999
156.74	6.88038	28.2044
-33.6116	-59.7176	28.2117
118.502	79.0771	28.2186
114.329	23.7599	28.22
143.561	-2.25228	28.2222
-143.141	29.3975	28.2239
-175.912	32.8575	28.2348
-74.5544	68.4315	28.2376
0.242817	70.2175	28.24
63.3627	-46.2101	28.2566
-67.2854	-24.0516	28.2574
-62.7711	-37.147	28.2582
35.2466	-25.9333	28.2582
130.015	77.4689	28.2587
-8.05867	-45.9763	28.2596
-72.4337	-65.2577	28.2641
-91.5044	76.216	28.2958
-110.743	34.8096	28.2982
-123.022	-26.3824	28.3045
-83.0777	39.0783	28.3272
-9.3846	-34.752	28.3283
114.406	44.6736	28.3361
106.273	-1.31389	28.3604
72.3402	-58.7805	28.363
-2.56152	-78.8039	28.3649
109.485	1.28411	28.3678
63.7775	-36.3252	28.3684
22.2364	-47.2584	28.3842
-123.678	-51.5386	28.3921
-172.327	-2.34159	28.3952
178.017	-20.1986	28.3963
51.4696	28.7162	28.3964
-64.2973	-30.1738	28.3965
-172.502	47.1505	28.4164
119.862	0.711799	28.4179
175.424	-13.9238	28.4275
-174.318	-35.9126	28.4278
-124.392	-28.1725	28.4371
103.805	23.5403	28.4462
-56.2898	-61.7804	28.462
-155.366	22.7188	28.4738
178.847	3.88675	28.4752
42.4103	-8.16286	28.4794
51.4932	-50.1275	28.4865
173.97	-28.2963	28.4908
173.881	24.7008	28.4946
-31.0928	-56.6354	28.4949
153.108	20.1097	28.4971
92.8985	-46.6549	28.5067
-172.483	48.1546	28.5074
-145.847	61.003	28.5128
-7.03561	2.70813	28.5219
-39.5062	-70.9762	28.5239
15.1821	-67.9204	28.5281
-131.557	47.4178	28.5292
118.11	-83.984	28.5332
-24.2364	-52.945	28.5392
32.9589	-76.5314	28.5426
103.417	4.9628	28.5459
-27.1842	-37.5427	28.5518
-41.3853	-71.2542	28.5601
-173.743	42.3173	28.5642
116.725	36.4513	28.5682
-2.04884	-2.73889	28.5719
115.4	44.0524	28.5829
-117.303	31.7313	28.5862
53.229	-30.194	28.5879
-34.3116	-53.9027	28.5892
56.5422	-64.4992	28.5943
-167.605	66.1429	28.596
160.572	-67.1464	28.596
110.665	74.8123	28.6258
148.788	-83.5255	28.6273
-43.1117	-40.482	28.6371
-126.757	-38.9183	28.6419
80.7344	-37.4277	28.6516
159.396	0.61766	28.672
80.1322	52.2526	28.6783
-171.783	-30.8835	28.6784
-73.1392	36.9832	28.682
-8.99581	-45.8681	28.6852
7.1666	-45.395	28.69
-89.4185	30.8533	28.6931
-143.578	-13.4115	28.6932
21.1002	-63.6962	28.6971
-86.9725	59.9267	28.7006
-101.351	21.8153	28.7042
177.9	-47.7005	28.7057
-173.2	8.50007	28.7057
72.1	39.7004	28.7057
-135.703	-14.285	28.7067
32.9834	-4.53887	28.7069
-82.9206	73.041	28.707
-114.754	20.8396	28.7115
136.7	17.7199	28.7122
-116.188	24.5245	28.7144
-163.976	6.2618	28.7153
-9.07822	-64.5734	28.7224
149.592	-15.3151	28.7244
-74.2514	-51.04	28.7245
-155.07	30.8734	28.7248
-110.643	-52.54	28.7256
-29.4957	-63.4511	28.7338
-115.106	-56.0249	28.7339
158.105	-4.10212	28.7348
150.394	-32.3837	28.7471
-152.973	-23.3056	28.7487
128.872	46.524	28.7525
99.9119	10.7387	28.7536
-134.006	-16.2061	28.7589
-142.914	33.3613	28.7726
163.688	-70.872	28.7733
-120.994	51.3734	28.7773
-176.162	-58.7893	28.7936
-42.282	-65.9409	28.7951
-137.431	49.7382	28.8024
-140.391	17.2727	28.8065
108.093	-0.287217	28.8122
-147.868	-40.2553	28.8153
92.3312	-6.39841	28.8168
3.91013	-58.2622	28.8249
42.6709	70.7277	28.8412
124.741	29.3346	28.8517
170.652	6.28393	28.8602
-70.9769	-59.0966	28.8685
-4.09319	-39.3348	28.8715
-162.123	33.4771	28.8754
-4.13169	-53.4086	28.8775
-99.1284	14.1904	28.8781
-141.869	-8.83341	28.8814
158.104	-12.4238	28.8897
128.276	50.7236	28.9012
175.378	-70.6973	28.9029
117.162	5.22376	28.9094
130.628	-6.93251	28.9139
-112.842	68.9832	28.9155
85.0771	70.98	28.9178
90.0651	-81.6817	28.922
-118.9	49.8294	28.9308
94.2856	69.385	28.934
89.8575	-44.5599	28.9645
43.0539	32.2803	28.9667
-132.271	-26.5768	28.967
21.2957	-59.2137	28.974
-174.67	-44.6678	28.9823
-142.236	16.3216	28.9933
105.252	2.09374	28.9958
14.2863	-4.35351	28.9985
-131.371	79.7804	29.0157
22.6416	-4.27471	29.023
142.157	-39.927	29.031
70.8413	-60.5721	29.033
77.3122	21.3333	29.051
-166.392	-76.8908	29.0543
97.7787	13.0779	29.0653
177.857	-61.8689	29.0984
-31.4829	-68.6877	29.1017
19.1626	1.94718	29.1029
-99.027	-0.585676	29.1051
-87.8602	-49.4937	29.1062
100.487	6.95137	29.1065
151.557	20.1331	29.109
148.272	67.1665	29.1092
-91.9024	20.9952	29.1394
175.204	-61.7303	29.1401
44.7369	-28.2598	29.1424
-159.893	-15.1268	29.143
98.4877	9.047	29.1437
129.99	44.9449	29.1481
-120.49	-69.7525	29.1531
84.6221	1.92512	29.1566
-99.478	75.2823	29.1588
149.75	-33.1252	29.164
10.6863	38.89	29.1699
74.2995	-66.6032	29.1711
-45.8754	-73.0345	29.1784
53.9759	-45.9649	29.1935
-2.2868	-47.8753	29.1939
-146.092	-53.8837	29.2004
7.03899	-58.6554	29.203
104.874	43.2433	29.2038
-60.5996	-78.6046	29.2241
156.939	-8.9686	29.2251
102.297	61.8889	29.2404
113.267	-33.878	29.2506
166.289	4.39499	29.2544
27.4342	-58.1215	29.2647
152.995	-53.8933	29.2681
-154.951	50.1108	29.2742
50.745	-47.4446	29.2776
128.647	-0.417001	29.2786
78.1417	13.7152	29.2819
-49.8664	-67.584	29.2824
23.8957	-60.8837	29.284
159.251	-35.6464	29.2841
84.5385	-9.11036	29.2851
-93.2983	27.994	29.291
90.9647	-41.2543	29.3078
-177.987	74.3596	29.316
37.5271	-77.0785	29.317
-149.52	-0.883329	29.3189
29.2099	-44.5106	29.3256
94.7278	-38.5634	29.3287
-101.232	72.7114	29.3427
-134.212	-51.5412	29.343
162.966	-21.3577	29.367
179.348	-19.7769	29.3752
-149.665	23.1112	29.3996
65.7233	-31.483	29.4079
-78.4694	20.6634	29.4174
57.7658	-52.5912	29.4655
150.275	28.566	29.4685
167.576	-15.9141	29.4768
-25.6942	-16.5145	29.4784
0.496343	-21.0096	29.488
-22.3966	-74.3924	29.4911
-84.6265	68.3915	29.5093
3.48268	-38.3917	29.5132
-153.978	80.1792	29.5144
149.591	-2.71013	29.518
-172.324	40.8622	29.5426
53.3342	9.43279	29.5552
100.644	8.66622	29.5623
-173.688	-57.5954	29.5672
-124.845	17.6683	29.5878
-101.226	64.7401	29.602
-127.971	-1.40127	29.6031
136.129	75.9065	29.6046
31.8046	-57.0182	29.6216
102.957	22.5305	29.6438
178.944	-47.9735	29.6462
-128.789	-54.5915	29.6474
71.3107	-14.1534	29.6584
20.0596	1.3379	29.6609
-129.072	26.3917	29.6612
-109.465	43.6152	29.6659
120.349	61.8647	29.6695
101.929	74.1907	29.6698
24.256	-69.3783	29.6702
88.682	-57.9014	29.675
44.9826	-12.6843	29.6775
-60.1429	51.8911	29.6844
-159.054	-34.0117	29.6899
-2.62858	-32.9166	29.6904
88.6714	54.2096	29.6948
45.4337	15.9182	29.6968
21.671	-11.6751	29.6973
-16.2834	-37.7359	29.6996
-140.154	-47.4762	29.7054
10.0265	-45.9493	29.7079
-149.637	-18.4129	29.7171
-145.007	-15.9847	29.7205
-166.85	-3.74097	29.7244
142.4	8.00007	29.7268
-169.158	-25.1861	29.7285
-171.227	10.4437	29.7295
-137.542	31.0549	29.7339
-37.0597	-15.0173	29.7349
138.857	-15.8878	29.7351
-177.624	-21.4015	29.7368
-144.244	7.99001	29.7383
68.4073	-3.88094	29.74
11.237	-82.2858	29.7447
-150.942	-10.1491	29.7482
-154.904	-20.6747	29.749
-87.6781	-48.6605	29.7492
-145.028	-10.8068	29.7518
-120.249	-75.3026	29.759
-75.1384	72.9212	29.7658
71.1943	-27.4763	29.7666
5.8325	-4.00597	29.7792
-104.779	39.743	29.7826
98.9706	35.9332	29.7866
-36.6763	4.57865	29.7869
-73.8025	69.0614	29.7966
33.1119	-38.7553	29.8094
-127.43	50.128	29.8119
173.582	40.1772	29.8144
179.988	54.3104	29.8181
46.9794	60.4931	29.8195
-173.996	43.0294	29.8203
29.7101	-11.0305	29.8215
93.0148	-51.1268	29.8328
-117.391	68.7347	29.8385
57.7968	-5.84586	29.8418
154.517	-22.2313	29.861
21.8711	-56.4556	29.884
-136.3	69.1637	29.8966
18.7444	-35.6594	29.8988
-8.85416	-37.7347	29.8994
143.438	-17.8774	29.9008
34.552	-64.1012	29.9195
41.8989	-15.744	29.9328
159.888	13.3593	29.9492
-142.464	-36.8201	29.9688
-156.013	28.5005	29.9786
-127.245	-20.0474	29.9815
85.0069	-63.2421	29.9885
31.3157	17.6623	29.9968
-87.0287	20.3227	30.0703
-21.0003	25.7616	30.0715
10.6151	-26.0961	30.0834
-126.329	-64.3201	30.0909
99.7272	39.4136	30.11
47.017	34.7342	30.1305
1.82945	77.3594	30.1336
0.818821	-46.0818	30.135
105.839	2.2338	30.1402
106.889	-57.458	30.1415
53.9378	78.166	30.1506
-117.28	-7.41213	30.1575
-165.593	44.0778	30.1676
93.5552	-9.24175	30.1683
-71.0653	-15.5037	30.1783
-176.391	38.1976	30.1879
150.678	54.6693	30.197
-103.825	65.8648	30.2
-147.937	-35.9411	30.2028
108.19	18.0154	30.2031
35.5457	-36.9207	30.2041
174.145	-64.2298	30.2125
85.5067	-46.1481	30.2129
136.929	-17.2086	30.2256
158.894	-46.36	30.2404
40.1675	26.2252	30.2475
-116.124	49.8697	30.2482
0.0605659	-50.2533	30.2565
161.597	-62.8168	30.2575
-162.147	11.6713	30.2686
17.2351	82.0706	30.2927
-78.9377	38.2216	30.2967
17.5655	-43.0892	30.2975
161.159	-23.2814	30.2988
21.2713	-34.9763	30.3034
-87.7208	59.0811	30.324
152.46	18.7816	30.3275
-49.1012	-40.9548	30.3282
24.564	-80.426	30.3367
157.975	-11.1956	30.3514
36.6045	-1.99138	30.3578
90.1668	-28.543	30.358
-112.649	7.41432	30.3596
-79.3906	49.0897	30.3628
-88.0546	-88.5172	30.3666
117.841	-37.0602	30.385
-39.7457	-40.9927	30.3877
-12.804	-69.3422	30.3916
121.607	80.2478	30.4033
40.1393	-17.8416	30.4222
51.8973	-47.5057	30.4342
72.862	-60.851	30.4413
-162.137	20.2328	30.4452
-15.8949	-51.7892	30.4535
-178.39	-2.81196	30.4583
98.9029	83.1473	30.4724
89.8293	-29.5346	30.4729
-97.5306	50.0745	30.4761
136.579	66.4104	30.4795
-72.3643	64.4801	30.4872
1.22737	-18.5508	30.4923
37.8461	-10.8998	30.4958
145.106	17.2125	30.498
-13.6597	-39.3428	30.5564
-52.7048	-32.3643	30.562
171.006	35.0938	30.5638
-53.8736	-39.4659	30.5709
90.7096	-62.209	30.5804
-125.936	11.8338	30.6024
59.6899	47.5579	30.6141
60.16	27.0842	30.6211
-131.162	43.0678	30.6283
-130.99	40.3	30.6385
125.911	-6.92782	30.6459
170.197	35.8163	30.6475
149.035	-38.4564	30.6657
-140.988	61.1652	30.6849
67.2602	-33.6022	30.6959
-168.552	-3.63962	30.7137
138.022	-20.6031	30.7166
4.98952	58.8386	30.7169
-172.318	0.990778	30.7173
3.5	-33.5003	30.7176
129.6	-14.6001	30.7176
135.163	19.0002	30.7176
-170	33.6003	30.7176
-106.306	27.7851	30.7198
-170.483	9.72962	30.7209
-152.769	-4.2477	30.725
41.2503	-48.6415	30.7296
-162.841	26.7902	30.7599
138.891	-25.4749	30.7622
121.752	52.0074	30.7676
75.6956	-36.7525	30.7739
171.975	-12.8098	30.7778
-136.979	40.0976	30.7865
167.075	19.6815	30.7914
128.846	55.9922	30.801
-161.369	34.6212	30.8073
-92.8243	61.5192	30.8079
38.4546	-9.88866	30.8138
[truncated: 3,183 more rows]
